# Supplementary material for: DFT2FEFFIT: a density-functional-theory-based structural toolkit to analyze EXAFS spectra
Source: PubMed Central journal article supplement (PMC11299619; doi:10.1107/s1600576724005454), 2024-07-17
Supplement: j-57-01229-sup1.pdf [file j-57-01229-sup1.pdf]

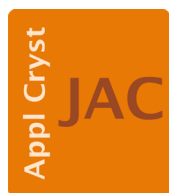

JOURNAL OF  
APPLIED  
CRYSTALLOGRAPHY

**Volume 57 (2024)**

**Supporting information for article:**

***DFT2FEFFIT*: a DFT-based structural toolkit to analyze EXAFS spectra**

**Alain Manceau, Romain Brossier, Olivier Mathon, Kirill A. Lomachenko, Marius Retegan, Pieter Glatzel and Stephan N. Steinmann**

## **S1. DFT calculation**

DFT computations were performed in the Vienna Ab-initio Simulation Package (VASP) software (Kresse, 1995; Kresse & Furthmuller, 1996). The projector augmented wave (PAW) pseudopotentials (Blochl, 1994; Kresse & Joubert, 1999) were used for the core-electron interaction, in combination with a converged energy cutoff of 500 eV for the planewave basis set. The energies and forces were evaluated at the generalized gradient approximation (GGA) with a Perdew-Burke-Ernzerhof (PBE; Perdew *et al.*, 1996) exchange-correlation functional in conjunction with the density-dependent dispersion correction dDsC (Steinmann & Corminboeuf, 2011; Gautier *et al.*, 2015). The Brillouin zone of 2 x 2 x 2 supercells with stoichiometry  $\text{Ca}_{80}\text{P}_{48}\text{O}_{192}\text{F}_{16}$  (FAp has two formula units in the primitive cell) and cell vector lengths of about 18.8 Å and 13.7 Å for in-plane and out-of-plane directions was probed at the Gamma point. A Fermi-smearing of 0.026 eV (~300 K) was applied, but had no impact on the electronic energy for this insulating material with a band gap of at least 4 eV. During the self-consistent field procedure, the wave functions were optimized to an energy-change below  $10^{-6}$  eV. The numerical settings for the fast Fourier transformation grids was set to “accurate” and the real-space projector operators were determined via the recommended automatic optimization scheme. For geometry optimizations all atoms and the unit cell were fully relaxed until the maximum force was below 0.05 eV/Å. The atomic Hirshfeld charges, which are known to depend little on the electronic structure and the basis set and are well suited for assessing charge-transfers (Gonthier *et al.*, 2012), have been taken from the standard output of the dDsC dispersion correction. The maximum error in the interatomic distances of FAp calculated with VASP relative to the diffraction values (Hughes *et al.*, 1989) is 1.15% (Manceau *et al.*, 2024). The starting configurations of the substitutional models are produced by replacing one element by another in the FAp structure. No symmetry constraints were applied, VASP guesses an initial symmetry based on the initial coordinates and unit cell.

## **S2. Input script and best-fit parameters of the Ce2-Si-close model**

Input :

Ce-EXAFS\_Durango\_RT.chi

22

2

2.5 10.4

0.9

1  
-2.5 -0.5 0.3  
1; F; 2.379; chip0001.dat;FEFF;1;0.06; 0.04; 0.13; 2  
2; O; 2.415; chip0002.dat; FEFF; 1; 0.06; 0.04; 0.13; -1  
3; O; 2.416; chip0003.dat; FEFF; 1; 0.06; 0.04; 0.13; 2  
4; O; 2.436; chip0004.dat; FEFF; 1; 0.06; 0.04; 0.13; 2  
5; O; 2.437; chip0005.dat; FEFF; 1; 0.06; 0.04; 0.13; 2  
6; O; 2.487; chip0006.dat; FEFF; 1; 0.06; 0.04; 0.13; 2  
7; O; 2.754; chip0007.dat; FEFF; 1; 0.06; 0.04; 0.13; 2  
8; Si; 3.095; chip0008.dat; FEFF; 1; 0.06; 0.04; 0.13; -1  
11; P; 3.197; chip0011.dat; FEFF; 1; 0.06; 0.04; 0.13; 8  
13; P; 3.616; chip0013.dat; FEFF; 1; 0.06; 0.04; 0.13; -1  
14; 2P; 3.774; chip0014.dat; FEFF; 1; 0.06; 0.04; 0.13; 13  
15; Ca; 3.967; chip0015.dat; FEFF; 1; 0.06; 0.04; 0.13; -1  
16; Ca; 4.010; chip0016.dat; FEFF; 1; 0.06; 0.04; 0.13; 15  
20; Ca; 4.066; chip0020.dat; FEFF; 1; 0.06; 0.04; 0.13; 15  
21; Ca; 4.068; chip0021.dat; FEFF; 1; 0.06; 0.04; 0.13; 15  
24; Ca; 4.100; chip0024.dat; FEFF; 1; 0.06; 0.04; 0.13; 15  
25; Ca; 4.101; chip0025.dat; FEFF; 1; 0.06; 0.04; 0.13; 15  
26; Ca; 4.131; chip0026.dat; FEFF; 1; 0.06; 0.04; 0.13; 15  
27; Ca; 4.133; chip0027.dat; FEFF; 1; 0.06; 0.04; 0.13; 15  
28; Ca; 4.144; chip0028.dat; FEFF; 1; 0.06; 0.04; 0.13; 15  
29; Ca; 4.148; chip0029.dat; FEFF; 1; 0.06; 0.04; 0.13; 15  
30; MS; 4.000; Ce2-Si-close\_MS.chi; 2C; 1; 0.10; 0.08; 0.17; -1

Best-fit parameters:

$\Delta E = -1.0$  eV;  $\sigma(\text{O},\text{F}) = 0.12$  Å;  $\sigma(\text{Si},\text{P1}) = 0.07$  Å;  $\sigma(\text{P2}) = 0.12$  Å;  $\sigma(\text{Ca}) = 0.11$  Å; ;  $\sigma(\text{MS}) = 0.17$  Å;  $NSS = 0.10$

The  $\sigma$  values of the cation shells at 8-12 K are:  $\sigma(\text{Si},\text{P1}) = 0.04$  Å;  $\sigma(\text{P2}) = 0.09$  Å;  $\sigma(\text{Ca}) = 0.08$  Å (Manceau *et al.*, 2024).

### S3. Input script and best-fit parameters of the Ce2-F model

Input :

Ce-EXAFS\_Durango\_RT.chi

24

2

2.5 10.4

0.9

1

-2.5 -0.5 0.3

1; F;2.31;chip0001.dat;FEFF;1;0.06; 0.04; 0.13; 2  
2; O;2.31;chip0002.dat;FEFF;1; 0.06;0.04; 0.13; -1  
3; O;2.31;chip0003.dat;FEFF;1; 0.06;0.04; 0.13; 2  
4; O;2.31;chip0004.dat;FEFF;1; 0.06;0.04; 0.13; 2  
5; O;2.31;chip0005.dat;FEFF;1; 0.06;0.04; 0.13; 2  
6; O;2.31;chip0006.dat;FEFF;1; 0.06;0.04; 0.13; 2  
7; O;2.31;chip0007.dat;FEFF;1; 0.06;0.04; 0.13; 2  
8; O;2.31;chip0008.dat;FEFF;1; 0.06;0.04; 0.13; 2  
10; P;2.31;chip0010.dat;FEFF;1; 0.06;0.04; 0.13; -1

11; P;2.31;chip0011.dat;FEFF;1; 0.06; 0.04; 0.13;10  
 14; P;2.31;chip0014.dat;FEFF;1; 0.06; 0.04; 0.13; -1  
 17; P;2.31;chip0017.dat;FEFF;1;0.06; 0.04; 0.13; 14  
 18; P;2.31;chip0018.dat;FEFF;1;0.06; 0.04; 0.13; 14  
 13; Ca;2.31;chip0013.dat;FEFF;1;0.06; 0.04; 0.15; -1  
 16; Ca;2.31;chip0016.dat;FEFF;1;0.06; 0.04; 0.15; 13  
 19; Ca;2.31;chip0019.dat;FEFF;1;0.06; 0.04; 0.15; 13  
 20; Ca;2.31;chip0020.dat;FEFF;1;0.06; 0.04; 0.15; 13  
 21; Ca;2.31;chip0021.dat;FEFF;1;0.06; 0.04; 0.15; 13  
 23; Ca;2.31;chip0023.dat;FEFF;1;0.06; 0.04; 0.15; 13  
 24; Ca;2.31;chip0024.dat;FEFF;1;0.06; 0.04; 0.15; 13  
 27; Ca;2.31;chip0027.dat;FEFF;1;0.06; 0.04; 0.15; 13  
 28; Ca;2.31;chip0028.dat;FEFF;1;0.06; 0.04; 0.15; 13  
 29; Ca;2.31;chip0029.dat;FEFF;1;0.06; 0.04; 0.15; 13  
 30; F;2.31;Ce2\_F\_interstitiel\_MS.dat;2C;1;0.10; 0.08; 0.17; -1

Best-fit parameters:

$\Delta E = -2.5$  eV;  $\sigma(\text{O,F}) = 0.13$  Å;  $\sigma(\text{P1}) = 0.08$  Å;  $\sigma(\text{P2}) = 0.13$  Å;  $\sigma(\text{Ca}) = 0.12$  Å; ;  $\sigma(\text{MS}) = 0.17$  Å;  
 NSS = 0.31

#### S4. Input script and best-fit parameters of the 2Ce2-Vac model

The amplitude of the Durango spectrum was multiplied by two to fit the DFT spectra at the Ce2\_1-Vac and Ce2\_2-Vac sites, and afterward the experimental and optimized spectra were divided by two.

Input:

```
Ce-EXAFS_Durango_RTx2.chi
44
2
2.5 10.4
0.9
1
-2.5 -0.5 0.3
#Ce2-1-Vac site
1; F;2.31;chip0001_1.dat;FEFF;1;0.06; 0.04; 0.13; 2
2; O;2.31;chip0002_1.dat;FEFF;1; 0.06;0.04; 0.13; -1
3; O;2.31;chip0003_1.dat;FEFF;1; 0.06;0.04; 0.13; 2
4; O;2.31;chip0004_1.dat;FEFF;1; 0.06;0.04; 0.13; 2
5; O;2.31;chip0005_1.dat;FEFF;1; 0.06;0.04; 0.13; 2
6; O;2.31;chip0006_1.dat;FEFF;1; 0.06;0.04; 0.13; 2
7; O;2.31;chip0007_1.dat;FEFF;1; 0.06;0.04; 0.13; 2
8; P;2.31;chip0008_1.dat;FEFF;1; 0.06;0.04; 0.13; -1
9; P;2.31;chip0009_1.dat;FEFF;1; 0.06; 0.04; 0.13;8
13; P;2.31;chip0013_1.dat;FEFF;1; 0.06; 0.04; 0.13; -1
14; P;2.31;chip0014_1.dat;FEFF;1;0.06; 0.04; 0.13; 13
15; P;2.31;chip0015_1.dat;FEFF;1;0.06; 0.04; 0.13; 13
19; Ca;2.31;chip0019_1.dat;FEFF;1;0.06; 0.04; 0.15; -1
20; Ca;2.31;chip0020_1.dat;FEFF;1;0.06; 0.04; 0.15; 19
21; Ce2;2.31;chip0021_1.dat;FEFF;1;0.06; 0.04; 0.15; -1
23; Ca;2.31;chip0023_1.dat;FEFF;1;0.06; 0.04; 0.15; 19
```

24; Ca;2.31;chip0024\_1.dat;FEFF;1;0.06; 0.04; 0.15; 19  
 25; Ca;2.31;chip0025\_1.dat;FEFF;1;0.06; 0.04; 0.15; 19  
 26; Ca;2.31;chip0026\_1.dat;FEFF;1;0.06; 0.04; 0.15; 19  
 28; Ca;2.31;chip0028\_1.dat;FEFF;1;0.06; 0.04; 0.15; 19  
 29; Ca;2.31;chip0029\_1.dat;FEFF;1;0.06; 0.04; 0.15; 19  
 30; MS;2.31;Ce2\_1\_Vac\_Together\_MS.chi;2C;1;0.10; 0.08; 0.17; -1  
 #Ce2-2-Vac site  
 31; F;2.31;chip0001\_2.dat;FEFF;1;0.06; 0.04; 0.13; 2  
 32; O;2.31;chip0002\_2.dat;FEFF;1; 0.06;0.04; 0.13; 2  
 33; O;2.31;chip0003\_2.dat;FEFF;1; 0.06;0.04; 0.13; 2  
 34; O;2.31;chip0004\_2.dat;FEFF;1; 0.06;0.04; 0.13; 2  
 35; O;2.31;chip0005\_2.dat;FEFF;1; 0.06;0.04; 0.13; 2  
 36; O;2.31;chip0006\_2.dat;FEFF;1; 0.06;0.04; 0.13; 2  
 37; O;2.31;chip0007\_2.dat;FEFF;1; 0.06;0.04; 0.13; 2  
 38; P;2.31;chip0010\_2.dat;FEFF;1; 0.06;0.04; 0.13; 8  
 39; P;2.31;chip0011\_2.dat;FEFF;1; 0.06; 0.04; 0.13;8  
 40; P;2.31;chip0013\_2.dat;FEFF;1; 0.06; 0.04; 0.13; 13  
 41; P;2.31;chip0014\_2.dat;FEFF;1;0.06; 0.04; 0.13; 13  
 42; P;2.31;chip0015\_2.dat;FEFF;1;0.06; 0.04; 0.13; 13  
 43; Ca;2.31;chip0016\_2.dat;FEFF;1;0.06; 0.04; 0.15; 19  
 44; Ca;2.31;chip0017\_2.dat;FEFF;1;0.06; 0.04; 0.15; 19  
 45; Ca;2.31;chip0018\_2.dat;FEFF;1;0.06; 0.04; 0.15; 19  
 46; Ca;2.31;chip0019\_2.dat;FEFF;1;0.06; 0.04; 0.15; 19  
 47; Ce1;2.31;chip0021\_2.dat;FEFF;1;0.06; 0.04; 0.15; 21  
 48; Ca;2.31;chip0026\_2.dat;FEFF;1;0.06; 0.04; 0.15; 19  
 49; Ca;2.31;chip0027\_2.dat;FEFF;1;0.06; 0.04; 0.15; 19  
 50; Ca;2.31;chip0028\_2.dat;FEFF;1;0.06; 0.04; 0.15; 19  
 51; Ca;2.31;chip0029\_2.dat;FEFF;1;0.06; 0.04; 0.15; 19  
 52; MS;2.31;Ce2\_2\_Vac\_Together\_MS.chi;2C;1;0.10; 0.08; 0.17; 30

Best-fit parameters:

$\Delta E = -1.3$  eV;  $\sigma(\text{O,F}) = 0.05$  Å;  $\sigma(\text{P1}) = 0.04$  Å;  $\sigma(\text{P2}) = 0.08$  Å;  $\sigma(\text{Ca}) = 0.07$  Å; ;  $\sigma(\text{MS}) = 0.17$  Å;  
 $NSS = 0.17$

## S5. References

- Bloch, P. E. (1994). *Phys. Rev. B.* **50**, 17953–17979.  
 Gautier, S., Steinmann, S., Michel, C., Fleurat-Lessard, P. & Sautet, P. (2015). *Phys. Chem. Chem. Phys.* **17**, 28921–28930.  
 Gonthier, J. F., Steinmann, S. N., Wodrich, M. D. & Corminboeuf, C. (2012). *Chem. Soc. Rev.* **41**, 4671–4687.  
 Hughes, J. M., Cameron, M. & Crowley, K. D. (1989). *Am. Miner.* **74**, 870–876.  
 Kresse, G. (1995). *J. Non-Cryst. Solids* **193**, 222–229.  
 Kresse, G. & Furthmüller, J. (1996). *Comput. Mater. Sci.* **6**, 15–50.  
 Kresse, G. & Joubert, D. (1999). *Phys. Rev. B.* **59**, 1758–1775.  
 Manceau, A., Mathon, O., Lomachenko, K. A., Rovezzi, M., Kvashnina, K. O., Boiron, M. C., Brossier, R. & Steinmann, S. N. (2024). *ACS Earth Space Chem.* **8**, 119–128.  
 Perdew, J. P., Burke, K. & Ernzerhof, M. (1996). *Phys. Rev. Lett.* **77**, 3865–3868.  
 Steinmann, S. N. & Corminboeuf, C. (2011). *J. Chem. Theory Comput.* **7**, 3567–3577.

## S6. EXAFS spectrum (Ce-EXAFS\_Durango\_RT.chi)

|        |            |
|--------|------------|
| 2.0000 | 0.033285   |
| 2.0500 | -0.0056294 |
| 2.1000 | -0.063230  |
| 2.1500 | -0.10729   |
| 2.2000 | -0.13473   |
| 2.2500 | -0.15114   |
| 2.3000 | -0.15464   |
| 2.3500 | -0.15564   |
| 2.4000 | -0.14836   |
| 2.4500 | -0.13583   |
| 2.5000 | -0.11378   |
| 2.5500 | -0.087390  |
| 2.6000 | -0.052464  |
| 2.6500 | -0.011952  |
| 2.7000 | 0.024822   |
| 2.7500 | 0.057343   |
| 2.8000 | 0.080193   |
| 2.8500 | 0.098267   |
| 2.9000 | 0.10792    |
| 2.9500 | 0.11015    |
| 3.0000 | 0.10162    |
| 3.0500 | 0.087279   |
| 3.1000 | 0.073539   |
| 3.1500 | 0.052451   |
| 3.2000 | 0.037923   |
| 3.2500 | 0.024309   |
| 3.3000 | 0.019305   |
| 3.3500 | 0.015608   |
| 3.4000 | 0.013077   |
| 3.4500 | 0.012445   |
| 3.5000 | 0.0076357  |
| 3.5500 | 0.0012066  |
| 3.6000 | -0.0064417 |
| 3.6500 | -0.017532  |
| 3.7000 | -0.028536  |
| 3.7500 | -0.037126  |
| 3.8000 | -0.043871  |
| 3.8500 | -0.048288  |
| 3.9000 | -0.048011  |
| 3.9500 | -0.047283  |
| 4.0000 | -0.045498  |
| 4.0500 | -0.044836  |
| 4.1000 | -0.039719  |
| 4.1500 | -0.034825  |
| 4.2000 | -0.024371  |
| 4.2500 | -0.011284  |
| 4.3000 | 0.0011470  |
| 4.3500 | 0.010359   |
| 4.4000 | 0.020198   |

|        |             |
|--------|-------------|
| 4.4500 | 0.026280    |
| 4.5000 | 0.027212    |
| 4.5500 | 0.027500    |
| 4.6000 | 0.026110    |
| 4.6500 | 0.022123    |
| 4.7000 | 0.017449    |
| 4.7500 | 0.013199    |
| 4.8000 | 0.010161    |
| 4.8500 | 0.0062488   |
| 4.9000 | 0.0027761   |
| 4.9500 | 0.00062829  |
| 5.0000 | 0.00065193  |
| 5.0500 | 0.0018544   |
| 5.1000 | 0.0012388   |
| 5.1500 | 0.0054323   |
| 5.2000 | 0.0087760   |
| 5.2500 | 0.010786    |
| 5.3000 | 0.011342    |
| 5.3500 | 0.0094710   |
| 5.4000 | 0.0063844   |
| 5.4500 | -0.00050645 |
| 5.5000 | -0.0033045  |
| 5.5500 | -0.0057661  |
| 5.6000 | -0.0051372  |
| 5.6500 | -0.0091065  |
| 5.7000 | -0.012307   |
| 5.7500 | -0.017990   |
| 5.8000 | -0.017328   |
| 5.8500 | -0.016017   |
| 5.9000 | -0.011794   |
| 5.9500 | -0.014823   |
| 6.0000 | -0.014039   |
| 6.0500 | -0.011419   |
| 6.1000 | -0.0075582  |
| 6.1500 | -0.00086814 |
| 6.2000 | 0.0060930   |
| 6.2500 | 0.0098138   |
| 6.3000 | 0.012384    |
| 6.3500 | 0.013952    |
| 6.4000 | 0.014752    |
| 6.4500 | 0.013128    |
| 6.5000 | 0.010026    |
| 6.5500 | 0.0084722   |
| 6.6000 | 0.0056942   |
| 6.6500 | 0.00031908  |
| 6.7000 | -0.0051293  |
| 6.7500 | -0.0049745  |
| 6.8000 | -0.0030537  |
| 6.8500 | -0.0021290  |
| 6.9000 | -0.0022931  |

6.9500 -0.0019634  
7.0000 -0.0010604  
7.0500 -0.00088457  
7.1000 0.0010552  
7.1500 0.0013429  
7.2000 0.00062010  
7.2500 0.00053089  
7.3000 -0.0028961  
7.3500 -0.0037367  
7.4000 -0.0028782  
7.4500 -0.0051570  
7.5000 -0.0035957  
7.5500 -0.0024387  
7.6000 -0.00025628  
7.6500 -0.00041177  
7.7000 -0.00082858  
7.7500 0.0021290  
7.8000 0.0026348  
7.8500 0.0047353  
7.9000 0.0033215  
7.9500 0.0036446  
8.0000 0.0029286  
8.0500 0.0025423  
8.1000 0.00099688  
8.1500 0.0020861  
8.2000 -0.00078354  
8.2500 -0.0018291  
8.3000 -0.0023871  
8.3500 -0.0012933  
8.4000 -0.0015607  
8.4500 -0.00083020  
8.5000 -0.00079647  
8.5500 -0.00045056  
8.6000 -0.00026179  
8.6500 -0.00021707  
8.7000 -0.00041447  
8.7500 -0.00056862  
8.8000 0.00065174  
8.8500 -0.00058880  
8.9000 -0.00033076  
8.9500 -0.0012026  
9.0000 -0.0023989  
9.0500 -0.0022052  
9.1000 -0.0016627  
9.1500 -0.00050149  
9.2000 -0.0026013  
9.2500 -0.0014177  
9.3000 -0.00092885  
9.3500 -0.00040318  
9.4000 0.00059581



9.4500 0.0017088  
 9.5000 0.0011485  
 9.5500 0.0016593  
 9.6000 0.0023186  
 9.6500 0.0021849  
 9.7000 0.0027773  
 9.7500 0.0029719  
 9.8000 0.0028724  
 9.8500 0.0021606  
 9.9000 0.0014000  
 9.9500 -0.00012312  
 10.000 0.00036067  
 10.050 -0.00043315  
 10.100 0.00054729  
 10.150 0.00031970  
 10.200 -0.0023175  
 10.250 -0.0018420  
 10.300 -0.0018910  
 10.350 -0.0028566  
 10.400 -0.0027410  
 10.450 -0.0013883

## S7. Cartesian coordinates of the DFT models ( $a = 100 \text{ \AA}$ , $b = 100 \text{ \AA}$ , $c = 100 \text{ \AA}$ )

### S7.1. Ce2-Si-close

|    |              |              |              |
|----|--------------|--------------|--------------|
| 58 | 5.734951401  | 10.098389649 | 5.142576935  |
| 14 | 8.283720557  | 8.342271684  | 5.144817405  |
| 20 | 9.370090676  | 5.424408519  | 3.448190122  |
| 20 | 9.376116308  | 5.424321125  | 6.826188073  |
| 20 | 5.958904535  | 6.095079503  | 5.145518040  |
| 20 | 4.687826819  | 2.698758031  | 13.750127248 |
| 20 | 4.693408561  | 2.713379275  | 6.876911998  |
| 20 | 14.086877586 | 2.719733768  | 13.755360374 |
| 20 | 14.078150039 | 2.725585789  | 6.871931734  |
| 20 | -0.004483200 | 10.854971840 | 13.754304664 |
| 20 | -0.055058312 | 10.868976580 | 6.878993205  |
| 20 | 9.401377178  | 10.860903145 | 13.756694287 |
| 20 | 9.397537895  | 10.785581731 | 6.854300521  |
| 20 | 0.014423557  | 5.426747556  | 6.855233109  |
| 20 | -0.002612375 | 5.427625894  | 13.731330630 |
| 20 | 9.392324608  | 5.425238117  | 13.738868836 |
| 20 | -4.703039008 | 13.585914353 | 6.853416076  |
| 20 | -4.701550119 | 13.570243142 | 13.731485624 |
| 20 | 4.693974238  | 13.627197860 | 6.872893959  |
| 20 | 4.679385812  | 13.595096052 | 13.718583764 |
| 20 | 8.208381147  | 1.969455574  | 1.698607485  |
| 20 | 8.207820740  | 1.970717912  | 8.587511429  |
| 20 | 17.598283938 | 1.985559755  | 1.700613090  |
| 20 | 17.598676748 | 1.986564493  | 8.585190103  |
| 20 | 3.502918287  | 10.137168770 | 1.666610328  |
| 20 | 3.503040495  | 10.139490917 | 8.620606575  |

|    |              |              |              |
|----|--------------|--------------|--------------|
| 20 | 12.895954836 | 10.115763145 | 1.705875617  |
| 20 | 12.895404060 | 10.115265608 | 8.579450927  |
| 20 | 3.592378081  | 6.131338424  | 1.715461938  |
| 20 | 3.593729285  | 6.132664897  | 8.571564789  |
| 20 | 12.964795464 | 6.122156302  | 1.705056385  |
| 20 | 12.965728158 | 6.122524923  | 8.581146015  |
| 20 | -1.125533982 | 14.271412801 | 1.699183832  |
| 20 | -1.126363498 | 14.271457584 | 8.586478453  |
| 20 | 8.282877764  | 14.286484203 | 1.695790928  |
| 20 | 8.281967283  | 14.286790469 | 8.587512083  |
| 20 | 1.111147533  | 2.012214701  | 5.142229079  |
| 20 | 1.117317294  | 2.019883362  | 12.023269433 |
| 20 | 10.498734633 | 1.998958040  | 5.143006728  |
| 20 | 10.502392582 | 2.020479641  | 12.023694814 |
| 20 | -3.608801400 | 10.146471479 | 5.143128709  |
| 20 | -3.584417612 | 10.155539142 | 12.023784740 |
| 20 | 5.829724306  | 10.152704110 | 12.024821781 |
| 20 | 2.299798305  | 0.033865710  | 1.703537355  |
| 20 | 2.299095751  | 0.033813641  | 8.582291263  |
| 20 | 11.679769298 | 0.050821382  | 1.700912110  |
| 20 | 11.678379959 | 0.050974113  | 8.583781769  |
| 20 | -2.400209037 | 8.180037214  | 1.699521768  |
| 20 | -2.399993643 | 8.180397856  | 8.584887906  |
| 20 | 7.005698233  | 8.159906932  | 1.706976495  |
| 20 | 7.007247986  | 8.159851094  | 8.582361993  |
| 20 | 2.333618655  | 8.058570229  | 5.143412125  |
| 20 | 2.394066657  | 8.105678038  | 12.024728846 |
| 20 | 11.744980291 | 8.124179967  | 5.142734421  |
| 20 | 11.778745130 | 8.102223051  | 12.023348118 |
| 20 | -2.311741993 | 16.228621618 | 5.143044527  |
| 20 | -2.303845052 | 16.251380042 | 12.023506532 |
| 20 | 7.089237382  | 16.262794899 | 5.142181351  |
| 20 | 7.092663027  | 16.260054547 | 12.023778017 |
| 20 | -3.522024580 | 6.161214078  | 5.142379071  |
| 20 | -3.516550635 | 6.165807477  | 12.023822169 |
| 20 | 5.877344733  | 6.160489197  | 12.024338781 |
| 20 | -8.206858611 | 14.312818189 | 5.142718458  |
| 20 | -8.207718599 | 14.312494268 | 12.023460623 |
| 20 | 1.188438672  | 14.286001500 | 5.141985182  |
| 20 | 1.170354424  | 14.317818613 | 12.023708919 |
| 20 | 0.015753271  | 5.429512925  | 3.419700330  |
| 20 | -0.001450695 | 5.430764184  | 10.304500599 |
| 20 | 9.389872324  | 5.423139910  | 10.298130766 |
| 20 | -4.703908823 | 13.583478842 | 3.421676630  |
| 20 | -4.703012047 | 13.568593929 | 10.304434465 |
| 20 | 4.694156830  | 13.625243939 | 3.402250020  |
| 20 | 4.680280542  | 13.593640137 | 10.317007058 |
| 20 | 4.693874425  | 2.709986729  | 3.417361005  |
| 20 | 4.688944464  | 2.698799826  | 10.306511351 |
| 20 | 14.077687079 | 2.726605634  | 3.422587932  |

|    |              |              |              |
|----|--------------|--------------|--------------|
| 20 | 14.086177419 | 2.718887402  | 10.301044186 |
| 20 | -0.057583087 | 10.868551365 | 3.415022847  |
| 20 | -0.004861943 | 10.854874059 | 10.302402438 |
| 20 | 9.400025001  | 10.788047212 | 3.439834151  |
| 20 | 9.401111835  | 10.864171899 | 10.299807744 |
| 15 | 1.593556942  | 3.249957713  | 1.698609150  |
| 15 | 1.594174964  | 3.250597214  | 8.585199357  |
| 15 | 10.981621107 | 3.236108127  | 1.700987992  |
| 15 | -3.113852272 | 11.386291371 | 1.696416922  |
| 15 | -3.113639775 | 11.385621730 | 8.587491742  |
| 15 | 6.298935807  | 11.432346872 | 1.657619637  |
| 15 | 6.297922609  | 11.433065262 | 8.627658160  |
| 15 | 3.121402886  | 4.871303659  | 5.144758518  |
| 15 | 3.102449252  | 4.913612448  | 12.024474613 |
| 15 | 12.494870077 | 4.888480456  | 5.143014920  |
| 15 | 12.494766112 | 4.888194055  | 12.024613858 |
| 15 | -1.598775325 | 13.035054179 | 5.143629922  |
| 15 | -1.598132764 | 13.040015074 | 12.024041315 |
| 15 | 7.794049718  | 13.071192034 | 5.142867346  |
| 15 | 7.799087546  | 13.052104237 | 12.023549962 |
| 15 | 1.097716357  | 7.907654937  | 1.708305023  |
| 15 | 1.097976446  | 7.907301613  | 8.576158763  |
| 15 | 10.489814252 | 7.888091920  | 1.697987276  |
| 15 | 10.489852920 | 7.888175351  | 8.586822062  |
| 15 | -3.606799987 | 16.039373642 | 1.697425826  |
| 15 | -3.608117324 | 16.038983844 | 8.586699983  |
| 15 | 5.785904736  | 16.062409308 | 1.698273974  |
| 15 | 5.785554161  | 16.061709157 | 8.585577848  |
| 15 | 3.596372196  | 0.243111739  | 5.143507247  |
| 15 | 3.593371941  | 0.237504864  | 12.024227243 |
| 15 | 12.993994593 | 0.252159736  | 5.142777067  |
| 15 | 12.982761335 | 0.249139775  | 12.023813036 |
| 15 | 10.982361059 | 3.236756575  | 8.583035280  |
| 15 | -1.084091654 | 8.398747146  | 5.143180789  |
| 15 | -1.096499439 | 8.386343563  | 12.024495239 |
| 15 | 8.304431640  | 8.389038642  | 12.025512934 |
| 15 | -2.680701452 | 5.148364809  | 1.704246801  |
| 15 | -2.681672325 | 5.148703294  | 8.579779543  |
| 15 | 6.699795406  | 5.120845294  | 1.681138299  |
| 15 | 6.701340678  | 5.119968389  | 8.605417136  |
| 15 | -7.383494177 | 13.281861066 | 1.708182500  |
| 15 | -7.384456943 | 13.281648099 | 8.575193676  |
| 15 | 2.004366390  | 13.289832581 | 1.700434952  |
| 15 | 2.003099512  | 13.290755531 | 8.582651084  |
| 15 | 16.781018560 | 3.004732916  | 5.143223344  |
| 15 | 7.373404367  | 2.999353564  | 12.025408983 |
| 15 | 7.400498332  | 2.948548694  | 5.144320121  |
| 15 | 16.770843676 | 3.005707426  | 12.023763584 |
| 15 | 2.710081028  | 11.133494263 | 5.144326361  |
| 15 | 2.669644252  | 11.159977588 | 12.025027459 |

|    |              |              |              |
|----|--------------|--------------|--------------|
| 15 | 12.077112630 | 11.161035999 | 5.143708602  |
| 15 | 12.075820863 | 11.143438305 | 12.024246554 |
| 8  | 3.018069601  | 2.649967267  | 1.702671589  |
| 8  | 3.018799752  | 2.651098242  | 8.587929134  |
| 8  | 12.415550393 | 2.653803323  | 1.698639416  |
| 8  | 12.415632152 | 2.653081819  | 8.592780681  |
| 8  | -1.681113283 | 10.800563039 | 1.692188622  |
| 8  | -1.680352711 | 10.801466595 | 8.598867495  |
| 8  | 7.720049632  | 10.844726662 | 1.685793833  |
| 8  | 7.719168176  | 10.845590114 | 8.608402644  |
| 8  | 1.697770231  | 5.481724153  | 5.144029486  |
| 8  | 1.669847103  | 5.500004884  | 12.022530235 |
| 8  | 11.072204720 | 5.486681826  | 5.139117718  |
| 8  | 11.062660431 | 5.467098986  | 12.021783457 |
| 8  | -3.013121705 | 13.653801100 | 5.141600271  |
| 8  | -3.028828373 | 13.625168429 | 12.021416831 |
| 8  | 6.342789223  | 13.606894107 | 5.140678159  |
| 8  | 6.367245203  | 13.639995365 | 12.020680807 |
| 8  | 5.580000497  | 1.281853652  | 1.705333690  |
| 8  | 5.579023330  | 1.281397038  | 8.585400160  |
| 8  | 14.979719618 | 1.305798051  | 1.714104284  |
| 8  | 14.980173037 | 1.305271259  | 8.577840155  |
| 8  | 0.897597349  | 9.442956434  | 1.736139838  |
| 8  | 0.896980883  | 9.442550664  | 8.557585110  |
| 8  | 10.276436152 | 9.420504557  | 1.691600609  |
| 8  | 10.275760227 | 9.420505109  | 8.600367800  |
| 8  | -0.847120782 | 6.871837917  | 5.141239745  |
| 8  | -0.886742137 | 6.854914075  | 12.022082194 |
| 8  | 8.446305880  | 6.725165927  | 5.143786763  |
| 8  | 8.525193048  | 6.860064305  | 12.023809214 |
| 8  | -5.581479706 | 15.000863020 | 5.141408534  |
| 8  | -5.598523193 | 14.993466128 | 12.022023090 |
| 8  | 3.812312311  | 15.008611663 | 5.140025804  |
| 8  | 3.793497206  | 15.004017268 | 12.020693654 |
| 8  | 5.480943929  | 4.169120517  | 1.677248747  |
| 8  | 5.483689702  | 4.167171655  | 8.618905011  |
| 8  | 14.879954075 | 4.196381027  | 1.707576545  |
| 8  | 14.879151057 | 4.196414711  | 8.583484648  |
| 8  | 0.788991372  | 12.333454471 | 1.710789561  |
| 8  | 0.788503979  | 12.333342971 | 8.579139377  |
| 8  | 10.180431509 | 12.327052367 | 1.720795656  |
| 8  | 10.179587433 | 12.326668813 | 8.568364931  |
| 8  | -0.784627451 | 3.965236178  | 5.140494321  |
| 8  | -0.789447411 | 3.958305777  | 12.020724007 |
| 8  | 8.635893811  | 3.873735306  | 5.142414111  |
| 8  | 8.591437650  | 3.951153436  | 12.023760534 |
| 8  | -5.481739669 | 12.116444524 | 5.142516048  |
| 8  | -5.482811924 | 12.093832499 | 12.022913717 |
| 8  | 3.889189905  | 12.142634569 | 5.143263306  |
| 8  | 3.887014022  | 12.110307300 | 12.022324787 |

|   |              |              |              |
|---|--------------|--------------|--------------|
| 8 | 1.632950223  | 4.807258781  | 1.680558908  |
| 8 | 1.632698180  | 4.807898957  | 8.580283574  |
| 8 | 11.008855319 | 4.791277049  | 1.700753479  |
| 8 | 11.010750463 | 4.791561317  | 8.556120595  |
| 8 | -3.080440403 | 12.942216103 | 1.688893661  |
| 8 | -3.081406080 | 12.941483197 | 8.567236700  |
| 8 | 6.316347861  | 12.984523550 | 1.634376077  |
| 8 | 6.315184154  | 12.985362431 | 8.619520172  |
| 8 | 3.069307270  | 3.315362534  | 5.145878165  |
| 8 | 3.071481206  | 3.356045165  | 12.030647060 |
| 8 | 12.454973268 | 3.331230029  | 5.151854799  |
| 8 | 12.470798886 | 3.331163702  | 12.031738271 |
| 8 | -1.657423460 | 11.479472007 | 5.150370885  |
| 8 | -1.624610479 | 11.483065423 | 12.032320120 |
| 8 | 7.783375148  | 11.508006980 | 5.149523619  |
| 8 | 7.771525835  | 11.495334994 | 12.034110745 |
| 8 | -0.265180485 | 7.158370337  | 1.669846863  |
| 8 | -0.265034436 | 7.156864677  | 8.583052015  |
| 8 | 9.128217925  | 7.133408616  | 1.706235004  |
| 8 | 9.129278321  | 7.132654404  | 8.556116577  |
| 8 | -4.970828402 | 15.289372333 | 1.676237483  |
| 8 | -4.972097157 | 15.288486870 | 8.584108761  |
| 8 | 4.418601620  | 15.315482942 | 1.658338955  |
| 8 | 4.417674794  | 15.314833122 | 8.603056733  |
| 8 | 4.957925335  | 0.996844700  | 5.150500892  |
| 8 | 4.958689491  | 0.985481483  | 12.031024193 |
| 8 | 14.355455748 | 1.007059590  | 5.150151038  |
| 8 | 14.349321279 | 0.994860541  | 12.032024325 |
| 8 | 0.271865924  | 9.171615871  | 5.150602846  |
| 8 | 0.266913398  | 9.140083428  | 12.033635280 |
| 8 | 9.696144705  | 9.164544687  | 5.147128665  |
| 8 | 9.661490383  | 9.151797439  | 12.030150389 |
| 8 | -1.345519470 | 4.347437335  | 1.690998855  |
| 8 | -1.346440686 | 4.347789283  | 8.569712118  |
| 8 | 8.035960028  | 4.323402163  | 1.693979407  |
| 8 | 8.037429286  | 4.323722261  | 8.556743994  |
| 8 | -6.044862964 | 12.485944500 | 1.686343948  |
| 8 | -6.045480793 | 12.485797763 | 8.570057431  |
| 8 | 3.343147369  | 12.494917029 | 1.677737543  |
| 8 | 3.342645269  | 12.496764170 | 8.581738403  |
| 8 | 6.074619632  | 3.766188472  | 5.150059445  |
| 8 | 6.034825445  | 3.794556809  | 12.033956166 |
| 8 | 15.443711618 | 3.800534237  | 5.150691747  |
| 8 | 15.436289415 | 3.805927066  | 12.031050456 |
| 8 | 1.352709639  | 11.881109110 | 5.146475165  |
| 8 | 1.333072458  | 11.955893634 | 12.032080251 |
| 8 | 10.740348213 | 11.957164144 | 5.151291390  |
| 8 | 10.743758976 | 11.949959389 | 12.030827205 |
| 8 | 0.794036076  | 2.777833463  | 0.457598192  |
| 8 | 0.797156833  | 2.787464617  | 7.339626492  |

|   |              |              |              |
|---|--------------|--------------|--------------|
| 8 | 10.188255396 | 2.765746990  | 0.455048127  |
| 8 | 10.192410303 | 2.733230443  | 7.350452730  |
| 8 | -3.908459832 | 10.911859730 | 0.455379543  |
| 8 | -3.898219193 | 10.897183674 | 7.345644468  |
| 8 | 5.489670642  | 10.923294742 | 0.442695103  |
| 8 | 5.487512336  | 10.991887690 | 7.372476470  |
| 8 | 3.918076209  | 5.312045801  | 6.396927513  |
| 8 | 3.893654293  | 5.387527383  | 13.268764343 |
| 8 | 13.297739377 | 5.346855791  | 6.387767767  |
| 8 | 13.290050324 | 5.358263535  | 13.269260319 |
| 8 | -0.789038080 | 13.478833025 | 6.389293272  |
| 8 | -0.803947556 | 13.512321239 | 13.268043687 |
| 8 | 8.572382318  | 13.553155666 | 6.385971713  |
| 8 | 8.594677651  | 13.526409532 | 13.265195537 |
| 8 | 1.929036954  | 7.479896415  | 0.474427777  |
| 8 | 1.892284165  | 7.434246709  | 7.331418364  |
| 8 | 11.283075084 | 7.431458643  | 0.446933747  |
| 8 | 11.322362975 | 7.456264141  | 7.355177431  |
| 8 | -2.791165960 | 15.592333402 | 0.457977804  |
| 8 | -2.806969008 | 15.576434095 | 7.343094780  |
| 8 | 6.615939023  | 15.625433238 | 0.466709058  |
| 8 | 6.561882958  | 15.588036296 | 7.329705974  |
| 8 | 2.789510311  | 0.691485532  | 6.387716049  |
| 8 | 2.791778703  | 0.697293246  | 13.267959912 |
| 8 | 12.189894581 | 0.697966304  | 6.388609363  |
| 8 | 12.177798632 | 0.698833641  | 13.267346822 |
| 8 | -1.889795766 | 8.846851338  | 6.387776248  |
| 8 | -1.901614308 | 8.840960268  | 13.267468184 |
| 8 | 7.399032532  | 8.877693254  | 6.437822282  |
| 8 | 7.497891255  | 8.840375652  | 13.270310153 |
| 8 | -2.698009881 | 6.073168057  | 0.460936826  |
| 8 | -2.695633544 | 6.075371220  | 7.337241559  |
| 8 | 6.702996796  | 6.043915603  | 0.436367240  |
| 8 | 6.642208471  | 6.059495518  | 7.379053441  |
| 8 | -7.412436710 | 14.211865640 | 0.467551045  |
| 8 | -7.394893010 | 14.213484315 | 7.336510079  |
| 8 | 1.973752111  | 14.220446155 | 0.463199394  |
| 8 | 1.997421607  | 14.210703846 | 7.334899104  |
| 8 | 7.397974360  | 2.028431137  | 6.389865734  |
| 8 | 7.387789955  | 2.071909430  | 13.267090201 |
| 8 | 16.799477365 | 2.079289409  | 6.385644162  |
| 8 | 16.783033533 | 2.083018187  | 13.267720632 |
| 8 | 2.814385818  | 10.197314104 | 6.375153687  |
| 8 | 2.678063813  | 10.233957412 | 13.266624446 |
| 8 | 12.103131860 | 10.238810619 | 6.387744250  |
| 8 | 12.084659435 | 10.220130716 | 13.268081650 |
| 8 | 3.917349315  | 5.312193285  | 3.891693973  |
| 8 | 3.893763183  | 5.376957477  | 10.775407747 |
| 8 | 13.297733074 | 5.331177237  | 3.891968500  |
| 8 | 13.289773396 | 5.346299286  | 10.774846028 |

|   |              |              |              |
|---|--------------|--------------|--------------|
| 8 | -0.790728107 | 13.467031938 | 3.891976253  |
| 8 | -0.804411668 | 13.497684138 | 10.773755076 |
| 8 | 8.572511451  | 13.542289612 | 3.894888024  |
| 8 | 8.593692672  | 13.507745478 | 10.773591213 |
| 8 | 0.796402038  | 2.810675282  | 2.952652360  |
| 8 | 0.794522694  | 2.801129634  | 9.834707037  |
| 8 | 10.191321166 | 2.760318144  | 2.944512288  |
| 8 | 10.187976363 | 2.796381209  | 9.839558870  |
| 8 | -3.898510652 | 10.928241766 | 2.950072825  |
| 8 | -3.908018189 | 10.939843327 | 9.839463484  |
| 8 | 5.489317995  | 11.022770483 | 2.924000315  |
| 8 | 5.488483208  | 10.955339858 | 9.855319904  |
| 8 | 2.800528604  | 0.696183051  | 3.893404909  |
| 8 | 2.802401515  | 0.702438276  | 10.775119840 |
| 8 | 12.201239665 | 0.704735838  | 3.891634471  |
| 8 | 12.190053218 | 0.706177620  | 10.774405565 |
| 8 | -1.877628516 | 8.852080928  | 3.892013389  |
| 8 | -1.886747477 | 8.847572088  | 10.773826221 |
| 8 | 7.401429418  | 8.879173640  | 3.850068285  |
| 8 | 7.505276289  | 8.844789422  | 10.776857735 |
| 8 | 1.863513365  | 7.418172871  | 2.964684820  |
| 8 | 1.901994485  | 7.464369194  | 9.822833502  |
| 8 | 11.302010352 | 7.442732186  | 2.938306127  |
| 8 | 11.263330097 | 7.419882024  | 9.845862867  |
| 8 | -2.827279114 | 15.565095385 | 2.950376941  |
| 8 | -2.814419044 | 15.579045281 | 9.835830043  |
| 8 | 6.542837175  | 15.576358229 | 2.961349343  |
| 8 | 6.595981280  | 15.612199639 | 9.825902080  |
| 8 | 7.389975353  | 2.034461745  | 3.893535787  |
| 8 | 7.376276413  | 2.081874328  | 10.775647871 |
| 8 | 16.788713129 | 2.085606991  | 3.895584151  |
| 8 | 16.772128465 | 2.088619700  | 10.775132456 |
| 8 | 2.811219679  | 10.198597571 | 3.911270581  |
| 8 | 2.667628001  | 10.240209261 | 10.778050215 |
| 8 | 12.093149587 | 10.248016689 | 3.892165837  |
| 8 | 12.075583962 | 10.227287521 | 10.774768747 |
| 8 | -2.672015531 | 6.062930728  | 2.955912172  |
| 8 | -2.676723405 | 6.061709148  | 9.832151148  |
| 8 | 6.672921314  | 6.042266271  | 2.922465047  |
| 8 | 6.736009005  | 6.024036612  | 9.863713398  |
| 8 | -7.369712726 | 14.199000307 | 2.957982039  |
| 8 | -7.389068460 | 14.196738956 | 9.827276013  |
| 8 | 2.020757769  | 14.197622966 | 2.957021876  |
| 8 | 1.992599983  | 14.209467305 | 9.829179808  |
| 9 | 0.000258552  | 0.013472406  | 1.740171102  |
| 9 | -0.000846347 | 0.013550218  | 8.600672388  |
| 9 | 9.383396870  | -0.010093879 | 1.727026751  |
| 9 | 9.382014601  | -0.009151215 | 8.616047179  |
| 9 | -4.695429777 | 8.143217416  | 1.719295195  |
| 9 | -4.695048482 | 8.143292487  | 8.622609754  |

|   |              |              |              |
|---|--------------|--------------|--------------|
| 9 | 4.691542480  | 8.173600453  | 1.762221144  |
| 9 | 4.692731110  | 8.175106380  | 8.590658008  |
| 9 | -0.000796403 | 0.002794483  | 5.144012845  |
| 9 | 0.004373728  | 0.004679679  | 12.023106744 |
| 9 | 9.396634280  | -0.041938025 | 5.144337329  |
| 9 | 9.387473005  | 0.000418346  | 12.023649966 |
| 9 | -4.701352644 | 8.132627953  | 5.141547163  |
| 9 | -4.697616427 | 8.139793174  | 12.024816677 |
| 9 | 4.632022295  | 7.989961681  | 5.152073704  |
| 9 | 4.694880289  | 8.153170041  | 12.026040503 |

## S7.2. Ce2-F

|    |              |              |              |
|----|--------------|--------------|--------------|
| 58 | 5.814436402  | 6.415898569  | 5.154174447  |
| 9  | 4.717061900  | 8.177729329  | 3.915922656  |
| 9  | 4.572558485  | 8.136650384  | 6.340246459  |
| 20 | 9.451200888  | 5.409227420  | 6.854198335  |
| 20 | 4.690200336  | 2.710796914  | 13.734267468 |
| 20 | 4.715808707  | 2.704070023  | 6.877057813  |
| 20 | 14.098747399 | 2.693531233  | 13.739061175 |
| 20 | 14.102531182 | 2.700367066  | 6.870631225  |
| 20 | 0.006723352  | 10.839450294 | 13.735388757 |
| 20 | 0.012648384  | 10.833758935 | 6.860125775  |
| 20 | 9.394952301  | 10.845882649 | 13.739695375 |
| 20 | 9.409979557  | 10.893190364 | 6.874051353  |
| 20 | -0.008455269 | 5.424005702  | 6.852616781  |
| 20 | 0.018228895  | 5.436077060  | 13.728706609 |
| 20 | 9.378137278  | 5.427364998  | 13.720324834 |
| 20 | -4.705078804 | 13.547162693 | 6.845603353  |
| 20 | -4.701602591 | 13.547400969 | 13.723042424 |
| 20 | 4.685329282  | 13.549196245 | 6.850673381  |
| 20 | 4.690392693  | 13.533074274 | 13.724378416 |
| 20 | 8.213652174  | 1.960614733  | 1.706987475  |
| 20 | 8.215355668  | 1.963255717  | 8.573431961  |
| 20 | 17.610498106 | 1.975229033  | 1.698932940  |
| 20 | 17.613142602 | 1.974166767  | 8.579064489  |
| 20 | 3.544434393  | 10.058807261 | 1.713574598  |
| 20 | 3.539885792  | 10.053989617 | 8.554644020  |
| 20 | 12.900816924 | 10.106679073 | 1.699742957  |
| 20 | 12.907461406 | 10.108443962 | 8.581980383  |
| 20 | 3.575328357  | 6.173175279  | 1.686578251  |
| 20 | 3.570507771  | 6.178701152  | 8.586982619  |
| 20 | 12.973096554 | 6.121706729  | 1.694366310  |
| 20 | 12.974209986 | 6.121694597  | 8.583050213  |
| 20 | -1.118734975 | 14.250714695 | 1.695858321  |
| 20 | -1.115611277 | 14.251409820 | 8.575746046  |
| 20 | 8.280578829  | 14.250208607 | 1.706023238  |
| 20 | 8.280367384  | 14.254376666 | 8.570360444  |
| 20 | 1.100009489  | 1.990396264  | 5.137175798  |
| 20 | 1.119725133  | 2.012898046  | 12.013237994 |
| 20 | 10.532720014 | 2.021154185  | 5.141496979  |



|    |              |              |              |
|----|--------------|--------------|--------------|
| 20 | 10.516796617 | 2.005543044  | 12.015689198 |
| 20 | -3.559480627 | 10.151160158 | 5.136293154  |
| 20 | -3.575751866 | 10.141962941 | 12.010352253 |
| 20 | 5.716921831  | 10.067393558 | 5.122074264  |
| 20 | 5.804881311  | 10.129070165 | 12.011400591 |
| 20 | 2.303620700  | 0.036494999  | 1.696720850  |
| 20 | 2.305964957  | 0.039495308  | 8.577413585  |
| 20 | 11.708414183 | 0.024255374  | 1.698598919  |
| 20 | 11.709574749 | 0.020546038  | 8.583062705  |
| 20 | -2.402038615 | 8.176001296  | 1.703582383  |
| 20 | -2.402302366 | 8.177037660  | 8.572631136  |
| 20 | 6.955018358  | 8.181973880  | 1.662479109  |
| 20 | 6.962861354  | 8.185070266  | 8.608258396  |
| 20 | 2.490159635  | 8.162454502  | 5.141772351  |
| 20 | 2.411292707  | 8.096194327  | 12.012335111 |
| 20 | 11.803118142 | 8.091988340  | 5.148368022  |
| 20 | 11.790063835 | 8.086740337  | 12.019306054 |
| 20 | -2.317270514 | 16.240597990 | 5.138215986  |
| 20 | -2.297206683 | 16.226074476 | 12.013574196 |
| 20 | 7.076155818  | 16.221348989 | 5.135804598  |
| 20 | 7.096997612  | 16.222639130 | 12.011461478 |
| 20 | -3.500609701 | 6.164638331  | 5.138293683  |
| 20 | -3.510855502 | 6.159007131  | 12.013494882 |
| 20 | 5.866537554  | 6.162086838  | 12.017184691 |
| 20 | -8.228036005 | 14.272455400 | 5.133568790  |
| 20 | -8.212920368 | 14.286540744 | 12.011045957 |
| 20 | 1.169659057  | 14.327599635 | 5.133714838  |
| 20 | 1.188009736  | 14.284984576 | 12.010816727 |
| 20 | -0.012688435 | 5.414846515  | 3.426154958  |
| 20 | 0.010881450  | 5.429819630  | 10.299175730 |
| 20 | 9.459714294  | 5.406252357  | 3.408642631  |
| 20 | 9.391482348  | 5.431783318  | 10.300144875 |
| 20 | -4.696178740 | 13.553883499 | 3.422862202  |
| 20 | -4.688713651 | 13.554759368 | 10.297296796 |
| 20 | 4.686390405  | 13.549588382 | 3.422145410  |
| 20 | 4.697656409  | 13.527137822 | 10.295300091 |
| 20 | 4.715006883  | 2.691219773  | 3.405868153  |
| 20 | 4.691480988  | 2.701208852  | 10.299035288 |
| 20 | 14.103679105 | 2.711993528  | 3.413922632  |
| 20 | 14.098297118 | 2.710033641  | 10.294355725 |
| 20 | -0.003475861 | 10.835130558 | 3.408792471  |
| 20 | 0.005513562  | 10.841848428 | 10.287779703 |
| 20 | 9.365267474  | 10.847623636 | 3.416547967  |
| 20 | 9.372972632  | 10.835021058 | 10.292722072 |
| 15 | 1.600414995  | 3.246682019  | 1.708571030  |
| 15 | 1.601175574  | 3.244178740  | 8.569106561  |
| 15 | 10.992554108 | 3.228595700  | 1.697638390  |
| 15 | 10.992100791 | 3.233810125  | 8.579239709  |
| 15 | -3.109321097 | 11.373743266 | 1.696936929  |
| 15 | -3.103582752 | 11.375315886 | 8.571178866  |

|    |              |              |              |
|----|--------------|--------------|--------------|
| 15 | 6.288365557  | 11.391629118 | 1.694881284  |
| 15 | 6.288003222  | 11.373188230 | 8.560021782  |
| 15 | 3.075960266  | 4.847322995  | 5.142207413  |
| 15 | 3.107009675  | 4.884099042  | 12.011777589 |
| 15 | 12.519644797 | 4.890789556  | 5.140833711  |
| 15 | 12.499859159 | 4.886964577  | 12.017038289 |
| 15 | -1.596015637 | 13.047131728 | 5.137575158  |
| 15 | -1.591310247 | 13.022702688 | 12.012388988 |
| 15 | 7.778536328  | 12.975454121 | 5.141661182  |
| 15 | 7.798668284  | 13.023123198 | 12.013365595 |
| 15 | 1.074498273  | 7.888755576  | 1.702563036  |
| 15 | 1.065353718  | 7.885411408  | 8.576749862  |
| 15 | 10.469414487 | 7.887810994  | 1.708996734  |
| 15 | 10.472707898 | 7.890017395  | 8.570982167  |
| 15 | -3.604985553 | 16.024066588 | 1.694891559  |
| 15 | -3.603293962 | 16.023740660 | 8.575582774  |
| 15 | 5.800257703  | 16.020017138 | 1.700207092  |
| 15 | 5.800485568  | 16.018476981 | 8.575852214  |
| 15 | 3.592570257  | 0.236302760  | 5.138408818  |
| 15 | 3.609611709  | 0.238512408  | 12.014796186 |
| 15 | 12.999227192 | 0.240624331  | 5.141050531  |
| 15 | 13.003853596 | 0.231727871  | 12.012321592 |
| 15 | -1.076969129 | 8.373821450  | 5.136008613  |
| 15 | -1.091957601 | 8.372524388  | 12.012284229 |
| 15 | 8.315109577  | 8.358179736  | 5.124827131  |
| 15 | 8.323527531  | 8.384708607  | 12.013899434 |
| 15 | -2.689752439 | 5.137214783  | 1.696166200  |
| 15 | -2.688993269 | 5.136235363  | 8.575963795  |
| 15 | 6.723146692  | 5.112727495  | 1.672340109  |
| 15 | 6.728187810  | 5.109906044  | 8.619568313  |
| 15 | -7.387638470 | 13.266614179 | 1.700425192  |
| 15 | -7.384568639 | 13.271994538 | 8.580828002  |
| 15 | 2.010720316  | 13.256887504 | 1.701774803  |
| 15 | 2.013209155  | 13.254083059 | 8.571144440  |
| 15 | 7.370917078  | 3.037322418  | 5.139326436  |
| 15 | 7.387479499  | 2.995793382  | 12.014500763 |
| 15 | 16.775426079 | 2.994162977  | 5.141532537  |
| 15 | 16.784988126 | 2.997166200  | 12.015509968 |
| 15 | 2.640193043  | 11.184938046 | 5.137542766  |
| 15 | 2.684719488  | 11.123117527 | 12.009472909 |
| 15 | 12.080924916 | 11.118479950 | 5.136125494  |
| 15 | 12.081059490 | 11.124452554 | 12.011165959 |
| 8  | 3.028795657  | 2.653909080  | 1.712026273  |
| 8  | 3.030194176  | 2.652058193  | 8.566946863  |
| 8  | 12.421933389 | 2.642700305  | 1.706253279  |
| 8  | 12.420972373 | 2.646349426  | 8.578669105  |
| 8  | -1.678983648 | 10.789905494 | 1.694929959  |
| 8  | -1.673828058 | 10.791159917 | 8.573740617  |
| 8  | 7.716688757  | 10.799857048 | 1.694577389  |
| 8  | 7.713524963  | 10.766354605 | 8.548067151  |

|   |              |              |              |
|---|--------------|--------------|--------------|
| 8 | 1.656731293  | 5.433690201  | 5.143282654  |
| 8 | 1.677069431  | 5.466245298  | 12.012070644 |
| 8 | 11.083562125 | 5.464784022  | 5.140803807  |
| 8 | 11.067830682 | 5.468156499  | 12.017571716 |
| 8 | -3.036623735 | 13.612075487 | 5.140939887  |
| 8 | -3.024209794 | 13.603742856 | 12.014715247 |
| 8 | 6.366445647  | 13.600142502 | 5.140817421  |
| 8 | 6.371158610  | 13.616294044 | 12.013321898 |
| 8 | 5.579976135  | 1.288639015  | 1.691615319  |
| 8 | 5.580267979  | 1.287771068  | 8.588347306  |
| 8 | 14.979958360 | 1.284328340  | 1.706797558  |
| 8 | 14.977839935 | 1.282086279  | 8.580544913  |
| 8 | 0.871084829  | 9.420129415  | 1.691559999  |
| 8 | 0.861708333  | 9.415838036  | 8.585883457  |
| 8 | 10.271071734 | 9.420474185  | 1.718376843  |
| 8 | 10.277699818 | 9.423159222  | 8.571534783  |
| 8 | -0.896900872 | 6.838316920  | 5.135634002  |
| 8 | -0.887922344 | 6.839615975  | 12.013024512 |
| 8 | 8.532622190  | 6.817073306  | 5.112314892  |
| 8 | 8.544744209  | 6.858090190  | 12.010346195 |
| 8 | -5.582658487 | 14.973883383 | 5.134237228  |
| 8 | -5.580974931 | 14.973876613 | 12.011342823 |
| 8 | 3.822406719  | 14.979702141 | 5.138436550  |
| 8 | 3.812106088  | 14.967235150 | 12.009081372 |
| 8 | 5.497875320  | 4.176244857  | 1.686127969  |
| 8 | 5.505739240  | 4.171676496  | 8.608378293  |
| 8 | 14.881196026 | 4.181165876  | 1.695775595  |
| 8 | 14.881686589 | 4.180486051  | 8.576352590  |
| 8 | 0.773445043  | 12.329876712 | 1.703603404  |
| 8 | 0.776398284  | 12.326584847 | 8.569484460  |
| 8 | 10.182416896 | 12.313631369 | 1.699614276  |
| 8 | 10.183542898 | 12.320352438 | 8.595536092  |
| 8 | -0.792578943 | 3.943462556  | 5.140836468  |
| 8 | -0.781397775 | 3.946303619  | 12.015552704 |
| 8 | 8.615619525  | 3.950584339  | 5.137559390  |
| 8 | 8.609392674  | 3.943510385  | 12.012791995 |
| 8 | -5.491528600 | 12.073781301 | 5.130692603  |
| 8 | -5.488578389 | 12.078132317 | 12.010209820 |
| 8 | 3.879390541  | 12.106691113 | 5.141548393  |
| 8 | 3.906792175  | 12.070417949 | 12.008525096 |
| 8 | 1.633758605  | 4.802394090  | 1.711838250  |
| 8 | 1.632797457  | 4.799916074  | 8.567657518  |
| 8 | 11.024310486 | 4.785791163  | 1.667731970  |
| 8 | 11.025030572 | 4.790709675  | 8.579631312  |
| 8 | -3.083047757 | 12.930722811 | 1.695652205  |
| 8 | -3.078551141 | 12.932198226 | 8.560076507  |
| 8 | 6.318341539  | 12.947034398 | 1.706408818  |
| 8 | 6.329028817  | 12.928405564 | 8.544602420  |
| 8 | 3.079575631  | 3.299360767  | 5.129878998  |
| 8 | 3.079288571  | 3.327227602  | 12.010303522 |

|   |              |              |              |
|---|--------------|--------------|--------------|
| 8 | 12.494042305 | 3.335286865  | 5.151413405  |
| 8 | 12.476548635 | 3.330184528  | 12.026818069 |
| 8 | -1.610491160 | 11.489737375 | 5.139127656  |
| 8 | -1.616928487 | 11.466541416 | 12.013102478 |
| 8 | 7.721694529  | 11.418555885 | 5.153586116  |
| 8 | 7.766156062  | 11.467460886 | 12.017663354 |
| 8 | -0.286858796 | 7.134710125  | 1.737691561  |
| 8 | -0.295180258 | 7.130374595  | 8.557182651  |
| 8 | 9.107182259  | 7.135914130  | 1.686650419  |
| 8 | 9.106457676  | 7.144393198  | 8.547646808  |
| 8 | -4.965438235 | 15.268141907 | 1.693236076  |
| 8 | -4.963380925 | 15.267408910 | 8.554393949  |
| 8 | 4.439796425  | 15.263199952 | 1.694779710  |
| 8 | 4.441318386  | 15.258787648 | 8.581082520  |
| 8 | 4.952199063  | 0.999533219  | 5.149317939  |
| 8 | 4.972935544  | 0.990276968  | 12.023342851 |
| 8 | 14.357114997 | 1.001833587  | 5.137168946  |
| 8 | 14.366826847 | 0.985553847  | 12.004987578 |
| 8 | 0.292128579  | 9.111401254  | 5.132632866  |
| 8 | 0.269536238  | 9.125298076  | 12.009787954 |
| 8 | 9.651358564  | 9.129289094  | 5.220204283  |
| 8 | 9.681050695  | 9.144636537  | 12.027847824 |
| 8 | -1.353136269 | 4.338150202  | 1.690201874  |
| 8 | -1.352697770 | 4.336464411  | 8.573724382  |
| 8 | 8.056442212  | 4.320465204  | 1.749062518  |
| 8 | 8.062316739  | 4.322461977  | 8.527944985  |
| 8 | -6.051973830 | 12.467783122 | 1.708244940  |
| 8 | -6.051301033 | 12.469357451 | 8.575964345  |
| 8 | 3.335380222  | 12.440951960 | 1.697461697  |
| 8 | 3.339179347  | 12.439972192 | 8.574072169  |
| 8 | 6.055097474  | 3.882675981  | 5.140847006  |
| 8 | 6.049835935  | 3.790745644  | 12.016988145 |
| 8 | 15.443142890 | 3.798386253  | 5.147376162  |
| 8 | 15.449217269 | 3.797239498  | 12.020248083 |
| 8 | 1.310661446  | 11.986953907 | 5.114342079  |
| 8 | 1.351862919  | 11.929329431 | 12.013173924 |
| 8 | 10.744525443 | 11.918811214 | 5.129997876  |
| 8 | 10.746078415 | 11.925462888 | 11.998541045 |
| 8 | 0.808463806  | 2.782984380  | 0.459707459  |
| 8 | 0.802791168  | 2.779923614  | 7.324266632  |
| 8 | 10.190473185 | 2.738382168  | 0.467682423  |
| 8 | 10.196644150 | 2.779298677  | 7.327884764  |
| 8 | -3.907627627 | 10.907948843 | 0.452953978  |
| 8 | -3.901207985 | 10.900949831 | 7.329552457  |
| 8 | 5.497195292  | 10.943343533 | 0.442481813  |
| 8 | 5.481429719  | 10.894670946 | 7.327092494  |
| 8 | 3.885251218  | 5.312403434  | 6.388733520  |
| 8 | 3.899527197  | 5.342784389  | 13.262218522 |
| 8 | 13.305297138 | 5.374835214  | 6.382571354  |
| 8 | 13.296840810 | 5.364474724  | 13.256680142 |

|   |              |              |              |
|---|--------------|--------------|--------------|
| 8 | -0.806787715 | 13.530034382 | 6.378853973  |
| 8 | -0.795919564 | 13.491371620 | 13.256073533 |
| 8 | 8.593319639  | 13.426564369 | 6.384762375  |
| 8 | 8.598502521  | 13.487362273 | 13.257624381 |
| 8 | 1.832581593  | 7.409489747  | 0.437681986  |
| 8 | 1.880963201  | 7.442233143  | 7.336913063  |
| 8 | 11.289381243 | 7.441448392  | 0.471946709  |
| 8 | 11.282267030 | 7.423926439  | 7.331967425  |
| 8 | -2.797366638 | 15.568704668 | 0.454632795  |
| 8 | -2.784733152 | 15.590251848 | 7.334537254  |
| 8 | 6.609402211  | 15.575225478 | 0.457703375  |
| 8 | 6.598131453  | 15.569029926 | 7.325803876  |
| 8 | 2.781501673  | 0.682326079  | 6.379597826  |
| 8 | 2.804244504  | 0.694906891  | 13.257190035 |
| 8 | 12.199407241 | 0.692398425  | 6.389064539  |
| 8 | 12.212866612 | 0.692663428  | 13.262727682 |
| 8 | -1.872477550 | 8.840470901  | 6.382699633  |
| 8 | -1.890244157 | 8.828317324  | 13.260311987 |
| 8 | 7.385173336  | 8.700666782  | 6.316522685  |
| 8 | 7.510087345  | 8.833694480  | 13.252156492 |
| 8 | -2.704008793 | 6.065770496  | 0.457333988  |
| 8 | -2.700699657 | 6.058022878  | 7.330843974  |
| 8 | 6.773916649  | 5.997256778  | 0.407211000  |
| 8 | 6.657216409  | 6.077565381  | 7.403205226  |
| 8 | -7.388511125 | 14.184280503 | 0.451990757  |
| 8 | -7.402804950 | 14.182075636 | 7.327194427  |
| 8 | 2.012456872  | 14.180080400 | 0.455087655  |
| 8 | 2.018973568  | 14.177892639 | 7.325009170  |
| 8 | 7.338773451  | 2.121466300  | 6.387797941  |
| 8 | 7.400817654  | 2.075684521  | 13.261879393 |
| 8 | 16.784870046 | 2.069172224  | 6.384810354  |
| 8 | 16.791139852 | 2.072100551  | 13.258847692 |
| 8 | 2.613840949  | 10.283172659 | 6.396412935  |
| 8 | 2.692008653  | 10.205243828 | 13.257796433 |
| 8 | 12.084483945 | 10.208519125 | 6.389548618  |
| 8 | 12.080488308 | 10.213615385 | 13.264705990 |
| 8 | 3.883550314  | 5.345207710  | 3.907620713  |
| 8 | 3.901895976  | 5.349992728  | 10.766027312 |
| 8 | 13.301834434 | 5.351037758  | 3.886703577  |
| 8 | 13.290657600 | 5.343989932  | 10.765269221 |
| 8 | -0.815257311 | 13.528028877 | 3.890162969  |
| 8 | -0.799669638 | 13.489941301 | 10.765269114 |
| 8 | 8.584658777  | 13.414200958 | 3.890172139  |
| 8 | 8.593539686  | 13.481133676 | 10.763770085 |
| 8 | 0.798925132  | 2.784569209  | 2.952652692  |
| 8 | 0.807706318  | 2.780022577  | 9.817188911  |
| 8 | 10.200109338 | 2.798774254  | 2.959601010  |
| 8 | 10.192317363 | 2.772182881  | 9.821541016  |
| 8 | -3.901219424 | 10.910342594 | 2.945740804  |
| 8 | -3.898340927 | 10.920644071 | 9.821513588  |

|   |              |              |              |
|---|--------------|--------------|--------------|
| 8 | 5.493839253  | 10.917957694 | 2.937758877  |
| 8 | 5.507211247  | 10.935925490 | 9.823264267  |
| 8 | 2.800479678  | 0.690167373  | 3.887660101  |
| 8 | 2.819367087  | 0.700123453  | 10.764410108 |
| 8 | 12.190187853 | 0.690086982  | 3.898243443  |
| 8 | 12.197168612 | 0.690459432  | 10.771284033 |
| 8 | -1.875721162 | 8.843358057  | 3.891515915  |
| 8 | -1.895471012 | 8.827297842  | 10.767117219 |
| 8 | 7.563090863  | 8.805161690  | 3.850583618  |
| 8 | 7.538349757  | 8.848122451  | 10.761234462 |
| 8 | 1.908750927  | 7.453365063  | 2.933923339  |
| 8 | 1.840572619  | 7.412517567  | 9.833427999  |
| 8 | 11.245188433 | 7.411544289  | 2.967071668  |
| 8 | 11.254167995 | 7.421642203  | 9.825258336  |
| 8 | -2.809165879 | 15.580290186 | 2.947565450  |
| 8 | -2.817563118 | 15.558694586 | 9.827157171  |
| 8 | 6.597928732  | 15.565677493 | 2.948997410  |
| 8 | 6.610924169  | 15.567533079 | 9.815805076  |
| 8 | 7.333554012  | 2.120231527  | 3.891034685  |
| 8 | 7.396091911  | 2.075935883  | 10.766601590 |
| 8 | 16.778050510 | 2.078142008  | 3.891762111  |
| 8 | 16.787644440 | 2.079718754  | 10.766817785 |
| 8 | 2.657797319  | 10.256370414 | 3.898054800  |
| 8 | 2.687467195  | 10.208006556 | 10.759233393 |
| 8 | 12.084515064 | 10.188608218 | 3.897532076  |
| 8 | 12.099958362 | 10.194163870 | 10.772636147 |
| 8 | -2.697320768 | 6.049922311  | 2.948028979  |
| 8 | -2.700013003 | 6.054850010  | 9.822199606  |
| 8 | 6.660957303  | 6.079637263  | 2.888308770  |
| 8 | 6.787612074  | 5.996227342  | 9.881566633  |
| 8 | -7.404061228 | 14.189611082 | 2.944860600  |
| 8 | -7.384272750 | 14.198676772 | 9.821148632  |
| 8 | 2.020836313  | 14.180355710 | 2.947571365  |
| 8 | 2.014991960  | 14.175923179 | 9.818297631  |
| 9 | 0.005326734  | 0.003624158  | 1.706849561  |
| 9 | 0.007349405  | 0.002962758  | 8.570603060  |
| 9 | 0.005366379  | 16.260964177 | 1.723493617  |
| 9 | 0.007805552  | 16.263542944 | 8.579382797  |
| 9 | -4.707698747 | 8.136142386  | 1.713500819  |
| 9 | -4.707256664 | 8.136587223  | 8.586399527  |
| 9 | 4.699234815  | 8.115118018  | 1.236649140  |
| 9 | 4.713857627  | 8.116374958  | 9.014136305  |
| 9 | -0.017060158 | -0.027802697 | 5.127483352  |
| 9 | 0.007189278  | -0.002148753 | 12.005006864 |
| 9 | 9.374581238  | 0.043161978  | 5.139932666  |
| 9 | 9.401260469  | -0.005039254 | 12.019225289 |
| 9 | -4.686644391 | 8.139621359  | 5.138895345  |
| 9 | -4.697393086 | 8.130810010  | 12.016479724 |
| 9 | 4.704154948  | 8.126920792  | 12.003893762 |

### S7.3. Ce2\_1-Vac

|    |              |              |              |
|----|--------------|--------------|--------------|
| 58 | 5.989536260  | 6.254715448  | 5.206259414  |
| 58 | 5.688379013  | 10.140998504 | 12.023013457 |
| 20 | 4.685868234  | 2.696900553  | 13.758309093 |
| 20 | 4.721371211  | 2.691190854  | 6.901275063  |
| 20 | 14.096137089 | 2.711741588  | 13.758466521 |
| 20 | 14.066941785 | 2.732999840  | 6.884717410  |
| 20 | -0.066226426 | 10.864254237 | 13.765546357 |
| 20 | -0.013068810 | 10.882571806 | 6.874496398  |
| 20 | 9.459407011  | 10.873520202 | -0.005148291 |
| 20 | 9.499893785  | 10.889711187 | 6.894805850  |
| 20 | -0.003897732 | 5.415586912  | 6.864400527  |
| 20 | -0.000893346 | 5.423484998  | 13.750426305 |
| 20 | 9.429745417  | 5.398774294  | 13.732663648 |
| 20 | -4.728910145 | 13.551785119 | 6.854181706  |
| 20 | -4.703002886 | 13.561646689 | 13.747667667 |
| 20 | 4.685051987  | 13.616708915 | 6.849262182  |
| 20 | 4.680102772  | 13.654766753 | 13.764085271 |
| 20 | 8.224309643  | 1.976172686  | 1.712739781  |
| 20 | 8.259398674  | 1.987407644  | 8.577495773  |
| 20 | 17.626924699 | 1.981939885  | 1.706239984  |
| 20 | 17.624308154 | 1.980757281  | 8.585482145  |
| 20 | 3.501122423  | 10.129821348 | 1.744566218  |
| 20 | 3.497188653  | 10.137491674 | 8.539352647  |
| 20 | 12.905963651 | 10.096091906 | 1.718631137  |
| 20 | 12.892821815 | 10.050777753 | 8.579872892  |
| 20 | 3.587493575  | 6.135719278  | 1.695605819  |
| 20 | 3.613740535  | 6.133720942  | 8.628760862  |
| 20 | 12.988353063 | 6.122381338  | 1.710848794  |
| 20 | 12.938712330 | 6.128105674  | 8.560076050  |
| 20 | -1.134135223 | 14.270442076 | 1.700751830  |
| 20 | -1.146156449 | 14.255469367 | 8.586438787  |
| 20 | 8.286421653  | 14.280672190 | 1.708262023  |
| 20 | 8.285204375  | 14.284210376 | 8.580787970  |
| 20 | 1.108065843  | 2.018031431  | 5.145718285  |
| 20 | 5.910630187  | 6.051507560  | 12.045216828 |
| 20 | 1.106594637  | 2.009779128  | 12.033675918 |
| 20 | 10.513201163 | 2.081257583  | 5.201665888  |
| 20 | 10.518482515 | 2.014493711  | 12.031768432 |
| 20 | -3.612221072 | 10.134664475 | 5.143326719  |
| 20 | -3.598104021 | 10.145795661 | 12.024010444 |
| 20 | 5.815470597  | 10.236435113 | 5.133417907  |
| 20 | 2.303358236  | 0.035987962  | 1.702623235  |
| 20 | 2.306492847  | 0.040034258  | 8.591353254  |
| 20 | 11.696414710 | 0.063251755  | 1.719068418  |
| 20 | 11.667511867 | 0.097542119  | 8.577380971  |
| 20 | -2.398030877 | 8.171764582  | 1.694266058  |
| 20 | -2.387182396 | 8.164538919  | 8.591265583  |
| 20 | 7.051913768  | 8.159610143  | 1.693439692  |
| 20 | 7.048331502  | 8.119895508  | 8.573675887  |

|    |              |              |              |
|----|--------------|--------------|--------------|
| 20 | 2.309823471  | 8.132968884  | 5.144786624  |
| 20 | 2.346350807  | 8.052341772  | 12.028512248 |
| 20 | 11.732478277 | 8.051194956  | 5.198800690  |
| 20 | 11.792487596 | 8.091702131  | 12.032788195 |
| 20 | -2.324923560 | 16.227109359 | 5.145139836  |
| 20 | -2.297926006 | 16.240182636 | 12.027896515 |
| 20 | 7.100091487  | 16.260113210 | 5.142297269  |
| 20 | 7.089554499  | 16.269182137 | 12.029198329 |
| 20 | -3.499047301 | 6.162530328  | 5.144409516  |
| 20 | -3.531314194 | 6.154810297  | 12.025260525 |
| 20 | -8.219017439 | 14.326110889 | 5.142077648  |
| 20 | -8.214535980 | 14.315729099 | 12.031842931 |
| 20 | 1.168377596  | 14.348742874 | 5.143829044  |
| 20 | 1.186727156  | 14.298543915 | 12.022413958 |
| 20 | -0.018090613 | 5.425170362  | 3.421450123  |
| 20 | 0.000176902  | 5.418498465  | 10.311765374 |
| 20 | 9.497532230  | 5.375916191  | 3.542142120  |
| 20 | 9.454024191  | 5.400039231  | 10.150077615 |
| 20 | -4.706804440 | 13.568372508 | 3.424548665  |
| 20 | -4.706654943 | 13.565904902 | 10.308868349 |
| 20 | 4.689892338  | 13.591302636 | 3.430351304  |
| 20 | 4.686442821  | 13.655962915 | 10.288613470 |
| 20 | 4.732159849  | 2.644877658  | 3.417637779  |
| 20 | 4.677870773  | 2.660777063  | 10.316476112 |
| 20 | 14.102681976 | 2.767757488  | 3.428663381  |
| 20 | 14.116217591 | 2.736315198  | 10.305517241 |
| 20 | -0.013141360 | 10.884685835 | 3.416825603  |
| 20 | -0.069455451 | 10.866583090 | 10.293539195 |
| 20 | 9.400064188  | 10.857488428 | 3.428582394  |
| 20 | 9.429082787  | 10.882336602 | 10.298064029 |
| 15 | 1.604097338  | 3.252564792  | 1.709215013  |
| 15 | 1.599236090  | 3.243824172  | 8.585974515  |
| 15 | 11.008498652 | 3.238260555  | 1.698087720  |
| 15 | 11.035293864 | 3.188175689  | 8.620149135  |
| 15 | -3.124653896 | 11.373891179 | 1.705952792  |
| 15 | -3.135674463 | 11.371215976 | 8.576319716  |
| 15 | 6.308211007  | 11.429254564 | 1.722417537  |
| 15 | 6.314048851  | 11.404962947 | 8.534155134  |
| 15 | 3.104007815  | 4.911144766  | 5.142693869  |
| 15 | 3.097676502  | 4.883694529  | 12.052250384 |
| 15 | 12.567429438 | 4.929650857  | 5.115391370  |
| 15 | 12.515692589 | 4.893017358  | 12.025867912 |
| 15 | -1.608170822 | 13.040543036 | 5.143523160  |
| 15 | -1.600397118 | 13.031006634 | 12.032179589 |
| 15 | 7.809805842  | 13.042654876 | 5.156607212  |
| 15 | 7.797537393  | 13.030329655 | 12.036229347 |
| 15 | 1.103351040  | 7.918568441  | 1.693849287  |
| 15 | 1.106624482  | 7.909689950  | 8.593644863  |
| 15 | 10.491646055 | 7.893103993  | 1.694035659  |
| 15 | 10.522775085 | 7.952513455  | 8.628231302  |



|    |              |              |              |
|----|--------------|--------------|--------------|
| 15 | -3.622993277 | 16.018514926 | 1.684068377  |
| 15 | -3.619562588 | 16.021262493 | 8.588484138  |
| 15 | 5.797608381  | 16.058532498 | 1.705336614  |
| 15 | 5.800339335  | 16.058344734 | 8.582750943  |
| 15 | 3.582455246  | 0.229922058  | 5.153031833  |
| 15 | 3.598950817  | 0.223945339  | 12.042223003 |
| 15 | 13.017317871 | 0.258373834  | 5.132840529  |
| 15 | 13.005594680 | 0.249336434  | 12.041755244 |
| 15 | -1.115712190 | 8.389494283  | 5.142438302  |
| 15 | -1.071226475 | 8.397648760  | 12.031165669 |
| 15 | 8.259267906  | 8.392907206  | 5.083141948  |
| 15 | 8.297729299  | 8.364002532  | 12.024043096 |
| 15 | -2.663007851 | 5.137507769  | 1.684127121  |
| 15 | -2.666441559 | 5.136344937  | 8.590851388  |
| 15 | 6.719195317  | 5.111663119  | 1.677562441  |
| 15 | 6.654272895  | 5.095958960  | 8.682830426  |
| 15 | -7.392200669 | 13.284064117 | 1.702349194  |
| 15 | -7.391271841 | 13.293868263 | 8.594484775  |
| 15 | 2.012666784  | 13.287800464 | 1.693150087  |
| 15 | 2.018469055  | 13.293531416 | 8.589447168  |
| 15 | 7.387838471  | 2.952113185  | 5.112244623  |
| 15 | 7.398760460  | 2.969739090  | 12.029235613 |
| 15 | 16.822335554 | 2.991956177  | 5.150969119  |
| 15 | 16.809272557 | 2.997767729  | 12.038370665 |
| 15 | 2.657836261  | 11.175056348 | 5.143183864  |
| 15 | 2.719294832  | 11.129287080 | 12.030517747 |
| 15 | 12.072918494 | 11.152987544 | 5.128308806  |
| 15 | 12.095901133 | 11.146019367 | 12.044056333 |
| 8  | 3.032754187  | 2.662135257  | 1.713377382  |
| 8  | 3.012966402  | 2.617732725  | 8.582739831  |
| 8  | 12.441513526 | 2.654181640  | 1.691206589  |
| 8  | 12.466834838 | 2.559391621  | 8.646316502  |
| 8  | -1.688773759 | 10.793695562 | 1.715015581  |
| 8  | -1.695166494 | 10.798164729 | 8.570962020  |
| 8  | 7.730809724  | 10.843370568 | 1.693604255  |
| 8  | 7.729264466  | 10.788028848 | 8.538683769  |
| 8  | 1.680580053  | 5.503031315  | 5.134518670  |
| 8  | 1.672958544  | 5.487972546  | 12.056637608 |
| 8  | 11.212853603 | 5.619160419  | 5.038005472  |
| 8  | 11.082186580 | 5.465582906  | 12.014246771 |
| 8  | -3.035007991 | 13.637588863 | 5.144773416  |
| 8  | -3.022049032 | 13.629857411 | 12.030494778 |
| 8  | 6.367691727  | 13.604300582 | 5.145388241  |
| 8  | 6.348393660  | 13.562601168 | 12.032641075 |
| 8  | 5.559089765  | 1.260001782  | 1.671728921  |
| 8  | 5.574268209  | 1.266914867  | 8.600513083  |
| 8  | 15.014311580 | 1.303962200  | 1.705267321  |
| 8  | 15.055241047 | 1.307727820  | 8.591109126  |
| 8  | 0.895723917  | 9.453010829  | 1.678410068  |
| 8  | 0.892637583  | 9.444537916  | 8.612493772  |

|   |              |              |              |
|---|--------------|--------------|--------------|
| 8 | 10.241643427 | 9.423995158  | 1.685565989  |
| 8 | 10.343707070 | 9.507899909  | 8.656136409  |
| 8 | -0.852650783 | 6.865730364  | 5.143299893  |
| 8 | -0.839813305 | 6.871563370  | 12.030237849 |
| 8 | 8.450328751  | 6.879300707  | 4.954020115  |
| 8 | 8.509694299  | 6.846915069  | 12.019498137 |
| 8 | -5.617741174 | 14.982575917 | 5.139844192  |
| 8 | -5.609184312 | 14.976040054 | 12.035525083 |
| 8 | 3.827436986  | 15.007506061 | 5.124978019  |
| 8 | 3.830787784  | 15.002684516 | 12.043544389 |
| 8 | 5.500103990  | 4.163590368  | 1.693787577  |
| 8 | 5.382578169  | 4.198449260  | 8.660135124  |
| 8 | 14.926104537 | 4.188950272  | 1.673782061  |
| 8 | 14.914317770 | 4.196547523  | 8.588464157  |
| 8 | 0.793222095  | 12.335609966 | 1.686433305  |
| 8 | 0.802185796  | 12.334708108 | 8.598340165  |
| 8 | 10.189261589 | 12.337523809 | 1.707012189  |
| 8 | 10.160613772 | 12.385546090 | 8.600413173  |
| 8 | -0.764782191 | 3.950569597  | 5.142094458  |
| 8 | -0.774722500 | 3.947920350  | 12.037867057 |
| 8 | 8.629914544  | 3.824260932  | 5.029421010  |
| 8 | 8.584406713  | 3.956208859  | 12.019805272 |
| 8 | -5.490514675 | 12.076040624 | 5.122556634  |
| 8 | -5.479559328 | 12.082832962 | 12.050281984 |
| 8 | 3.891925946  | 12.104810109 | 5.145425863  |
| 8 | 3.907300157  | 12.134651114 | 12.029644126 |
| 8 | 1.634118542  | 4.811628528  | 1.717068975  |
| 8 | 1.654970487  | 4.801183800  | 8.584750778  |
| 8 | 11.041801074 | 4.793667578  | 1.722505240  |
| 8 | 11.130732399 | 4.717910834  | 8.605347525  |
| 8 | -3.090809029 | 12.929887730 | 1.701138860  |
| 8 | -3.107024007 | 12.927986059 | 8.563882403  |
| 8 | 6.315270453  | 12.978380999 | 1.679748193  |
| 8 | 6.338619000  | 12.955218173 | 8.554368768  |
| 8 | 3.091588285  | 3.360671507  | 5.142047286  |
| 8 | 3.058205585  | 3.328561953  | 12.021817369 |
| 8 | 12.472272129 | 3.370086262  | 5.168240921  |
| 8 | 12.500850488 | 3.334247683  | 12.036648172 |
| 8 | -1.645201469 | 11.484054841 | 5.147336677  |
| 8 | -1.645386115 | 11.473802680 | 12.032394886 |
| 8 | 7.799964850  | 11.485259129 | 5.207337624  |
| 8 | 7.784547576  | 11.460421534 | 12.043374947 |
| 8 | -0.254100885 | 7.161648139  | 1.696867173  |
| 8 | -0.248937922 | 7.148980774  | 8.574457700  |
| 8 | 9.144439184  | 7.114657766  | 1.719540588  |
| 8 | 9.150027429  | 7.265344426  | 8.631148661  |
| 8 | -4.985208201 | 15.263126326 | 1.685935057  |
| 8 | -4.985422371 | 15.271570761 | 8.561788501  |
| 8 | 4.427309653  | 15.315523970 | 1.731385500  |
| 8 | 4.418423893  | 15.338959039 | 8.564367065  |

|   |              |              |              |
|---|--------------|--------------|--------------|
| 8 | 4.946016058  | 0.975739665  | 5.189791834  |
| 8 | 4.965089899  | 0.966964034  | 12.053790558 |
| 8 | 14.380516283 | 1.013406805  | 5.138794808  |
| 8 | 14.367541740 | 1.005214281  | 12.012141347 |
| 8 | 0.230058218  | 9.178671052  | 5.146594153  |
| 8 | 0.287218796  | 9.169508310  | 12.030264716 |
| 8 | 9.599580104  | 9.155051673  | 5.232058668  |
| 8 | 9.635632379  | 9.148165356  | 12.031890259 |
| 8 | -1.327250407 | 4.335031614  | 1.679902952  |
| 8 | -1.333614435 | 4.326861711  | 8.582837369  |
| 8 | 8.056260441  | 4.335218354  | 1.730838717  |
| 8 | 7.928241412  | 4.257657851  | 8.698672133  |
| 8 | -6.061583077 | 12.476937273 | 1.704345570  |
| 8 | -6.082178900 | 12.455016402 | 8.594247271  |
| 8 | 3.350537839  | 12.487069575 | 1.695159066  |
| 8 | 3.359597908  | 12.495299365 | 8.573967363  |
| 8 | 6.060754095  | 3.805448232  | 5.168484328  |
| 8 | 6.034957485  | 3.734164092  | 12.026249951 |
| 8 | 15.491463915 | 3.789250950  | 5.184642342  |
| 8 | 15.476379675 | 3.797699237  | 12.043979003 |
| 8 | 1.331467460  | 11.984300784 | 5.147038666  |
| 8 | 1.364903480  | 11.873209492 | 12.026715086 |
| 8 | 10.752103546 | 11.981264372 | 5.131496910  |
| 8 | 10.765723094 | 11.962106256 | 12.013157012 |
| 8 | 0.813426058  | 2.793962352  | 0.457931418  |
| 8 | 0.797441952  | 2.798043437  | 7.337534774  |
| 8 | 10.209787259 | 2.800884503  | 0.442595677  |
| 8 | 10.266764068 | 2.554679048  | 7.438628386  |
| 8 | -3.908917220 | 10.902318053 | 0.456982328  |
| 8 | -3.930816223 | 10.892950843 | 7.337643846  |
| 8 | 5.499309460  | 10.932334644 | 0.486696493  |
| 8 | 5.483749016  | 10.938430234 | 7.318598318  |
| 8 | 3.901244499  | 5.394073089  | 6.389808528  |
| 8 | 3.895409797  | 5.306838761  | 13.312708405 |
| 8 | 13.378701371 | 5.384587490  | 6.360110550  |
| 8 | 13.303296943 | 5.366499543  | 13.279215928 |
| 8 | -0.806991629 | 13.503763957 | 6.387592418  |
| 8 | -0.792248569 | 13.473632216 | 13.279000211 |
| 8 | 8.606595787  | 13.557127287 | 6.380223988  |
| 8 | 8.587360288  | 13.495839843 | 13.279487416 |
| 8 | 1.912234731  | 7.454614692  | 0.455362629  |
| 8 | 1.926454208  | 7.478641824  | 7.351984621  |
| 8 | 11.275473126 | 7.441273804  | 0.435332678  |
| 8 | 11.440326612 | 7.612013919  | 7.436172114  |
| 8 | -2.818453863 | 15.553178257 | 0.444271520  |
| 8 | -2.804240490 | 15.573536461 | 7.350902458  |
| 8 | 6.561299090  | 15.577713548 | 0.440642379  |
| 8 | 6.601675212  | 15.580417433 | 7.344285402  |
| 8 | 2.754429591  | 0.679602246  | 6.381861640  |
| 8 | 2.790071231  | 0.684441968  | 13.281583484 |

|   |              |              |              |
|---|--------------|--------------|--------------|
| 8 | 12.222486908 | 0.693852797  | 6.383461957  |
| 8 | 12.235994050 | 0.703315233  | 13.305345655 |
| 8 | -1.927693254 | 8.823698218  | 6.385564869  |
| 8 | -1.866748922 | 8.853948923  | 13.279591032 |
| 8 | 7.302443365  | 8.678894820  | 6.279340043  |
| 8 | 7.459368143  | 8.824254409  | 13.263646696 |
| 8 | -2.661540523 | 6.066028962  | 0.441486878  |
| 8 | -2.654109969 | 6.061265214  | 7.347619714  |
| 8 | 6.726917944  | 6.031931938  | 0.433910697  |
| 8 | 6.550436872  | 6.058477058  | 7.462657977  |
| 8 | -7.404215773 | 14.198786094 | 0.451611175  |
| 8 | -7.386133807 | 14.205908132 | 7.342398463  |
| 8 | 2.020409164  | 14.203394815 | 0.442351111  |
| 8 | 1.996818765  | 14.215904596 | 7.346006135  |
| 8 | 7.375968733  | 2.036123815  | 6.362785184  |
| 8 | 7.417807542  | 2.063931691  | 13.290234614 |
| 8 | 16.869175302 | 2.050097977  | 6.378648719  |
| 8 | 16.823104312 | 2.068938322  | 13.279316958 |
| 8 | 2.651196572  | 10.246391469 | 6.384075705  |
| 8 | 2.839441141  | 10.193651461 | 13.261045075 |
| 8 | 12.053917128 | 10.254847632 | 6.387121673  |
| 8 | 12.053493908 | 10.247851383 | 13.307404660 |
| 8 | 3.925158974  | 5.404733237  | 3.915680085  |
| 8 | 3.890365490  | 5.380207693  | 10.822531033 |
| 8 | 13.437332459 | 5.262680838  | 3.859133702  |
| 8 | 13.329449687 | 5.356175667  | 10.788790680 |
| 8 | -0.811553544 | 13.496679487 | 3.892973705  |
| 8 | -0.793656407 | 13.472658834 | 10.783294922 |
| 8 | 8.587398950  | 13.475361264 | 3.888245320  |
| 8 | 8.582659837  | 13.483948608 | 10.784933095 |
| 8 | 0.804000275  | 2.787126728  | 2.951800896  |
| 8 | 0.798968247  | 2.796216357  | 9.835966715  |
| 8 | 10.217465703 | 2.736360083  | 2.930141395  |
| 8 | 10.217279866 | 2.782375545  | 9.885308850  |
| 8 | -3.920170148 | 10.911116108 | 2.950925244  |
| 8 | -3.911931659 | 10.918091499 | 9.835635387  |
| 8 | 5.499998190  | 10.984138237 | 2.962485651  |
| 8 | 5.519973625  | 10.955312612 | 9.798364514  |
| 8 | 2.816728738  | 0.704049546  | 3.891122176  |
| 8 | 2.811538787  | 0.691771263  | 10.790694262 |
| 8 | 12.214892143 | 0.711341474  | 3.891880985  |
| 8 | 12.172712197 | 0.666627358  | 10.812168195 |
| 8 | -1.920147603 | 8.824422527  | 3.893958007  |
| 8 | -1.868209502 | 8.854041118  | 10.783124560 |
| 8 | 7.516520699  | 8.960145381  | 3.833764991  |
| 8 | 7.454729031  | 8.843549901  | 10.798287732 |
| 8 | 1.909946403  | 7.478921563  | 2.941948287  |
| 8 | 1.894948171  | 7.440678948  | 9.842964359  |
| 8 | 11.338353825 | 7.491681092  | 2.922144398  |
| 8 | 11.293259986 | 7.449179666  | 9.886155295  |

|   |              |              |              |
|---|--------------|--------------|--------------|
| 8 | -2.831765462 | 15.568454435 | 2.938068488  |
| 8 | -2.852339800 | 15.543050234 | 9.847513556  |
| 8 | 6.615282100  | 15.591756441 | 2.937252663  |
| 8 | 6.561902183  | 15.558223869 | 9.843509978  |
| 8 | 7.238042639  | 2.034210483  | 3.861416804  |
| 8 | 7.416974883  | 2.025891233  | 10.801249743 |
| 8 | 16.820403060 | 2.087527537  | 3.892915121  |
| 8 | 16.820504987 | 2.076054529  | 10.792313599 |
| 8 | 2.649062745  | 10.255994396 | 3.894962711  |
| 8 | 2.850904274  | 10.190052569 | 10.802754106 |
| 8 | 12.039925092 | 10.229827988 | 3.887321996  |
| 8 | 12.118738331 | 10.210788948 | 10.814398576 |
| 8 | -2.649231118 | 6.048437108  | 2.938668964  |
| 8 | -2.642106816 | 6.043886643  | 9.849029451  |
| 8 | 6.643512990  | 6.074514003  | 2.897587491  |
| 8 | 6.667533163  | 6.061899783  | 9.898085328  |
| 8 | -7.402848860 | 14.211296681 | 2.943418877  |
| 8 | -7.379126756 | 14.215689948 | 9.840293304  |
| 8 | 2.000095127  | 14.204942428 | 2.940909097  |
| 8 | 2.036200974  | 14.194442561 | 9.848707139  |
| 9 | -0.000011857 | 0.001902136  | 1.694717810  |
| 9 | 0.002063168  | 0.002495930  | 8.603674301  |
| 9 | -0.012173317 | 16.272137989 | 1.695845961  |
| 9 | -0.028390903 | 16.223892442 | 8.655567466  |
| 9 | -4.688395162 | 8.134664878  | 1.690099630  |
| 9 | -4.651218024 | 8.129721239  | 8.654958633  |
| 9 | 4.728988574  | 8.170918375  | 1.693018430  |
| 9 | 4.703825115  | 8.191146189  | 8.637863490  |
| 9 | 0.000341885  | 0.000783023  | 5.117953698  |
| 9 | -9.412927097 | 16.272799305 | 12.027150369 |
| 9 | 9.383385514  | 0.021858368  | 5.129130564  |
| 9 | 9.411507327  | -0.036658688 | 12.064675967 |
| 9 | 14.067561984 | 8.131332650  | 5.125378646  |
| 9 | -4.697079347 | 8.143448445  | 12.059836485 |
| 9 | 4.615077306  | 8.215641611  | 5.096614825  |
| 9 | 4.675508248  | 8.015858171  | 12.065755263 |

#### S7.4. Ce2\_2-Vac

|    |              |              |              |
|----|--------------|--------------|--------------|
| 58 | 5.964974512  | 6.355300232  | 5.268592441  |
| 58 | 5.724540897  | 10.098065736 | 11.943750879 |
| 20 | -0.004112281 | 10.869108859 | 6.871073472  |
| 20 | 5.802595846  | 10.253355547 | 5.154746800  |
| 20 | 9.393769614  | 5.447266560  | 6.903526884  |
| 20 | 4.660820634  | 2.695333296  | 13.766574551 |
| 20 | 4.724414973  | 2.678091658  | 6.903257384  |
| 20 | 14.095019434 | 2.715372756  | 13.756987430 |
| 20 | 14.119326426 | 2.716017686  | 6.873832320  |
| 20 | -0.023646805 | 10.839306770 | 13.743873710 |
| 20 | 9.448718523  | 10.883939333 | -0.017701991 |
| 20 | 9.452569888  | 10.902078850 | 6.917793390  |

|    |              |              |              |
|----|--------------|--------------|--------------|
| 20 | -0.015813305 | 5.469137331  | 6.873495774  |
| 20 | 0.009485331  | 5.417747826  | 13.752699192 |
| 20 | 9.422567168  | 5.375904628  | 13.728211647 |
| 20 | -4.731061016 | 13.561922815 | 6.850558487  |
| 20 | -4.713730649 | 13.574620250 | 13.742368904 |
| 20 | 4.651399236  | 13.592629942 | 6.846416558  |
| 20 | 4.683546117  | 13.639486962 | 13.754232134 |
| 20 | 8.227289137  | 1.961696612  | 1.713167220  |
| 20 | 8.238290775  | 1.921121858  | 8.585146215  |
| 20 | 17.632279300 | 1.974042826  | 1.711198358  |
| 20 | 17.625965595 | 1.962790113  | 8.590538344  |
| 20 | 3.510685248  | 10.123957901 | 1.745108365  |
| 20 | 3.558605670  | 10.129162857 | 8.537201049  |
| 20 | 12.901575017 | 10.116694414 | 1.702578895  |
| 20 | 12.890532064 | 10.064804430 | 8.590408020  |
| 20 | 3.584879158  | 6.139364496  | 1.693191303  |
| 20 | 3.573496658  | 6.125477363  | 8.648890344  |
| 20 | 12.996258036 | 6.134207500  | 1.707292905  |
| 20 | 12.971896208 | 6.100188515  | 8.596781631  |
| 20 | -1.137245722 | 14.268398541 | 1.694383988  |
| 20 | -1.146289336 | 14.243845956 | 8.575525396  |
| 20 | 8.275714475  | 14.275924446 | 1.701708426  |
| 20 | 8.261623806  | 14.270917794 | 8.584892462  |
| 20 | 1.137226354  | 2.029043041  | 5.152569378  |
| 20 | 1.109721491  | 1.992709448  | 12.032887036 |
| 20 | 10.539300985 | 2.011640681  | 5.149699346  |
| 20 | 10.512750089 | 1.967572227  | 12.027576046 |
| 20 | -3.614685360 | 10.160986583 | 5.134370058  |
| 20 | -3.605942034 | 10.142847861 | 12.020837622 |
| 20 | 2.300895503  | 0.031200503  | 1.712017111  |
| 20 | 2.302894940  | 0.027692354  | 8.600032816  |
| 20 | 11.706808857 | 0.029331831  | 1.703722068  |
| 20 | 11.693651991 | 0.053056215  | 8.589348753  |
| 20 | -2.405059587 | 8.191062193  | 1.693553014  |
| 20 | -2.433990543 | 8.185326369  | 8.584956747  |
| 20 | 7.043502057  | 8.156523386  | 1.660667728  |
| 20 | 2.290799994  | 8.127937512  | 5.156314215  |
| 20 | 2.352193012  | 8.038435449  | 12.016086786 |
| 20 | 11.769792961 | 8.100384302  | 5.170264733  |
| 20 | 11.819548319 | 8.086721461  | 12.034276377 |
| 20 | -2.318635810 | 16.254628437 | 5.141578344  |
| 20 | -2.307961860 | 16.221734659 | 12.019696724 |
| 20 | 7.102909363  | 16.269971685 | 5.144756167  |
| 20 | 7.096216028  | 16.263733174 | 12.016865697 |
| 20 | -3.539667515 | 6.182422090  | 5.147912345  |
| 20 | -3.524021215 | 6.140909672  | 12.024153060 |
| 20 | 5.938436775  | 6.042714203  | 12.013917871 |
| 20 | -8.233237895 | 14.330081748 | 5.144575114  |
| 20 | -8.224809384 | 14.305058538 | 12.014450888 |
| 20 | 1.159759117  | 14.334143420 | 5.135477443  |

|    |              |              |              |
|----|--------------|--------------|--------------|
| 20 | 1.188107888  | 14.263138997 | 12.008433748 |
| 20 | -0.023102427 | 5.432583936  | 3.433698394  |
| 20 | 0.006613967  | 5.438821431  | 10.311266437 |
| 20 | 9.481699016  | 5.389181322  | 3.410710472  |
| 20 | 9.330204651  | 5.475251580  | 10.299629276 |
| 20 | -4.712783823 | 13.581049435 | 3.419804795  |
| 20 | -4.724160431 | 13.581042218 | 10.311630182 |
| 20 | 4.687312633  | 13.599099110 | 3.427682822  |
| 20 | 4.696366858  | 13.642218601 | 10.284344218 |
| 20 | 4.717480737  | 2.670066202  | 3.428417850  |
| 20 | 4.724530668  | 2.681634539  | 10.310427988 |
| 20 | 14.122969777 | 2.708123235  | 3.420276138  |
| 20 | 14.083288810 | 2.722963025  | 10.304932097 |
| 20 | -0.015613636 | 10.878542096 | 3.407849050  |
| 20 | -0.104174092 | 10.864973034 | 10.273058377 |
| 20 | 9.391913530  | 10.825785405 | 3.425785255  |
| 20 | 9.349395523  | 10.741222975 | 10.258283683 |
| 15 | 1.596328102  | 3.258777972  | 1.721894380  |
| 15 | 1.592195464  | 3.224158191  | 8.590960289  |
| 15 | 11.009975063 | 3.228132555  | 1.703156311  |
| 15 | 11.005969609 | 3.191281747  | 8.587691750  |
| 15 | -3.126316714 | 11.390690663 | 1.695296902  |
| 15 | -3.142420340 | 11.373748024 | 8.564881587  |
| 15 | 6.304892973  | 11.422884304 | 1.694380489  |
| 15 | 6.321954995  | 11.493102744 | 8.516480147  |
| 15 | 3.111928113  | 4.943428494  | 5.155477249  |
| 15 | 3.111100451  | 4.850941571  | 12.049661746 |
| 15 | 12.520575304 | 4.875220679  | 5.152241560  |
| 15 | 12.500291278 | 4.881627345  | 12.033903912 |
| 15 | -1.614820931 | 13.041918559 | 5.133984699  |
| 15 | -1.604264845 | 13.020481834 | 12.027401742 |
| 15 | 7.801001101  | 13.059609223 | 5.145094785  |
| 15 | 7.802119076  | 13.052840438 | 12.028550741 |
| 15 | 1.087215192  | 7.907493299  | 1.697009287  |
| 15 | 1.048904620  | 7.895282183  | 8.604239868  |
| 15 | 10.492110174 | 7.882089281  | 1.694531641  |
| 15 | 10.528253717 | 7.873992486  | 8.586595874  |
| 15 | -3.618238153 | 16.046082251 | 1.689618776  |
| 15 | -3.621636565 | 16.020996850 | 8.578717860  |
| 15 | 5.794362832  | 16.068234971 | 1.695209064  |
| 15 | 5.782739223  | 16.078640551 | 8.580183705  |
| 15 | 3.614400985  | 0.239951244  | 5.152081000  |
| 15 | 3.614176005  | 0.224872845  | 12.047936591 |
| 15 | 13.007265128 | 0.233204536  | 5.138149654  |
| 15 | 13.026923123 | 0.244506637  | 12.034697729 |
| 15 | -1.132486054 | 8.399749147  | 5.135071641  |
| 15 | -1.076546016 | 8.394762639  | 12.023027719 |
| 15 | 8.311883907  | 8.374698288  | 5.041873703  |
| 15 | 8.320445664  | 8.383046253  | 12.053401174 |
| 15 | -2.697817364 | 5.157150802  | 1.700130442  |

|    |              |              |              |
|----|--------------|--------------|--------------|
| 15 | -2.690917620 | 5.145983078  | 8.586376880  |
| 15 | 6.709312614  | 5.118518553  | 1.712315754  |
| 15 | 6.785803158  | 5.033583509  | 8.649473050  |
| 15 | -7.400206147 | 13.295803542 | 1.705694313  |
| 15 | -7.381608376 | 13.287556679 | 8.600304124  |
| 15 | 2.011927606  | 13.278396991 | 1.689969124  |
| 15 | 1.990954544  | 13.297290029 | 8.582111225  |
| 15 | 7.378733432  | 3.011782669  | 5.150604730  |
| 15 | 7.420736480  | 2.936241447  | 12.042735907 |
| 15 | 16.804541320 | 3.007401042  | 5.150939138  |
| 15 | 16.814481312 | 2.987002442  | 12.036097126 |
| 15 | 2.648437565  | 11.167061662 | 5.129467500  |
| 15 | 2.731382154  | 11.117176238 | 12.034666492 |
| 15 | 12.074207333 | 11.145590938 | 5.133956572  |
| 15 | 12.088417853 | 11.137253289 | 12.023778128 |
| 8  | 3.024377209  | 2.667094674  | 1.729373872  |
| 8  | 3.028065344  | 2.645230924  | 8.598421201  |
| 8  | 12.433823704 | 2.629573950  | 1.717134806  |
| 8  | 12.452322178 | 2.630605365  | 8.570230562  |
| 8  | -1.690955227 | 10.813407183 | 1.700882361  |
| 8  | -1.704754677 | 10.794073549 | 8.545986185  |
| 8  | 7.742957787  | 10.884804041 | 1.658136140  |
| 8  | 7.778243878  | 11.036592549 | 8.521617762  |
| 8  | 1.677869258  | 5.509375926  | 5.145217813  |
| 8  | 1.691161742  | 5.464762015  | 12.050866635 |
| 8  | 11.085619392 | 5.443969168  | 5.169439361  |
| 8  | 11.081874843 | 5.496277254  | 12.025560626 |
| 8  | -3.045005437 | 13.630501526 | 5.131549517  |
| 8  | -3.023159732 | 13.628579234 | 12.031858325 |
| 8  | 6.361120586  | 13.631357521 | 5.136729685  |
| 8  | 6.356480364  | 13.597896209 | 12.044445326 |
| 8  | 5.599409886  | 1.280081595  | 1.687537426  |
| 8  | 5.597900607  | 1.252711874  | 8.598724771  |
| 8  | 15.016097187 | 1.301223924  | 1.692838621  |
| 8  | 15.013737014 | 1.312924569  | 8.610907781  |
| 8  | 0.869393184  | 9.437448627  | 1.681266937  |
| 8  | 0.906554115  | 9.438901116  | 8.633472707  |
| 8  | 10.261100096 | 9.410309584  | 1.694802550  |
| 8  | 10.339430019 | 9.419204400  | 8.577638079  |
| 8  | -0.883266819 | 6.873514873  | 5.131503475  |
| 8  | -0.862411877 | 6.864788938  | 12.033980712 |
| 8  | 8.594011354  | 6.841283817  | 5.015775172  |
| 8  | 8.491993127  | 6.850955442  | 12.081045498 |
| 8  | -5.609505624 | 15.007604299 | 5.134180343  |
| 8  | -5.602701000 | 14.991934178 | 12.046152193 |
| 8  | 3.790119673  | 14.998698843 | 5.122309686  |
| 8  | 3.824660133  | 15.012964068 | 12.020529005 |
| 8  | 5.490765910  | 4.172804757  | 1.746161402  |
| 8  | 5.526282581  | 4.116917256  | 8.600661585  |
| 8  | 14.889821010 | 4.198671486  | 1.703806794  |



|   |              |              |              |
|---|--------------|--------------|--------------|
| 8 | 14.899648635 | 4.185940658  | 8.590978240  |
| 8 | 0.793320340  | 12.327521003 | 1.676207178  |
| 8 | 0.762857426  | 12.353506329 | 8.582620433  |
| 8 | 10.203272330 | 12.320617543 | 1.720528240  |
| 8 | 10.202726412 | 12.342166729 | 8.628448309  |
| 8 | -0.781229259 | 3.965349579  | 5.155903901  |
| 8 | -0.792635881 | 3.971377842  | 12.030836288 |
| 8 | 8.588073534  | 3.969156730  | 5.147542069  |
| 8 | 8.620172006  | 3.912929322  | 12.027290425 |
| 8 | -5.509874021 | 12.099734433 | 5.108141126  |
| 8 | -5.505982955 | 12.107807612 | 12.028270625 |
| 8 | 3.886027929  | 12.093828943 | 5.115428362  |
| 8 | 3.902986134  | 12.137457052 | 12.055680701 |
| 8 | 1.627952004  | 4.815791766  | 1.744877260  |
| 8 | 1.610980082  | 4.781044848  | 8.577012617  |
| 8 | 11.052977745 | 4.784076188  | 1.672659334  |
| 8 | 11.019469889 | 4.744130771  | 8.629074424  |
| 8 | -3.097900103 | 12.947918703 | 1.686765387  |
| 8 | -3.110832991 | 12.929571202 | 8.580968573  |
| 8 | 6.282129388  | 12.976564415 | 1.703270172  |
| 8 | 6.259377847  | 13.054308696 | 8.537016064  |
| 8 | 3.107795527  | 3.391428317  | 5.162362692  |
| 8 | 3.065713394  | 3.297623860  | 12.000202340 |
| 8 | 12.507128592 | 3.317417330  | 5.127846999  |
| 8 | 12.451131352 | 3.325202575  | 12.043472793 |
| 8 | -1.642922675 | 11.486011724 | 5.148544784  |
| 8 | -1.653462457 | 11.464744338 | 12.032372986 |
| 8 | 7.786079477  | 11.500788372 | 5.180669446  |
| 8 | 7.784830997  | 11.488020218 | 11.990941903 |
| 8 | -0.270000996 | 7.146411232  | 1.711612645  |
| 8 | -0.334523048 | 7.180899675  | 8.595254326  |
| 8 | 9.150325058  | 7.094275826  | 1.621270962  |
| 8 | 9.214697102  | 7.083477519  | 8.588232628  |
| 8 | -4.984918550 | 15.301207547 | 1.704509019  |
| 8 | -4.988688325 | 15.278719145 | 8.571748131  |
| 8 | 4.424914258  | 15.324092226 | 1.730631359  |
| 8 | 4.411165090  | 15.339969832 | 8.540951392  |
| 8 | 4.982272139  | 0.985179709  | 5.164738291  |
| 8 | 4.980962605  | 0.968900417  | 12.033292288 |
| 8 | 14.373760229 | 0.980257719  | 5.139295375  |
| 8 | 14.384867046 | 1.005802125  | 12.038725768 |
| 8 | 0.219088681  | 9.176711330  | 5.146674246  |
| 8 | 0.287604680  | 9.153393261  | 11.989826949 |
| 8 | 9.613900056  | 9.150407630  | 5.357576521  |
| 8 | 9.693934360  | 9.109886176  | 12.085025511 |
| 8 | -1.364205962 | 4.351322424  | 1.699320179  |
| 8 | -1.354351048 | 4.344626164  | 8.592095268  |
| 8 | 8.045701631  | 4.327556420  | 1.704454378  |
| 8 | 8.117700539  | 4.217697571  | 8.610208632  |
| 8 | -6.059000577 | 12.503997715 | 1.705747257  |

|   |              |              |              |
|---|--------------|--------------|--------------|
| 8 | -6.056733267 | 12.469263698 | 8.591667007  |
| 8 | 3.352661587  | 12.486947011 | 1.721943500  |
| 8 | 3.322328949  | 12.494568892 | 8.599952286  |
| 8 | 6.038417128  | 3.821941773  | 5.156786651  |
| 8 | 6.068621687  | 3.709637867  | 12.093102410 |
| 8 | 15.471808653 | 3.810964692  | 5.139131569  |
| 8 | 15.469521253 | 3.772895592  | 12.034758446 |
| 8 | 1.325068897  | 11.983310500 | 5.151628465  |
| 8 | 1.372045984  | 11.849239329 | 11.909945228 |
| 8 | 10.747033044 | 11.958505817 | 5.162203629  |
| 8 | 10.746994114 | 11.925677793 | 11.958607809 |
| 8 | 0.811173425  | 2.817683834  | 0.460419920  |
| 8 | 0.803271347  | 2.740956654  | 7.347492708  |
| 8 | 10.208336361 | 2.747672392  | 0.469014228  |
| 8 | 10.226209315 | 2.733115163  | 7.327762849  |
| 8 | -3.917001746 | 10.914454062 | 0.450329774  |
| 8 | -3.940991952 | 10.920800910 | 7.320068701  |
| 8 | 5.504043412  | 10.946101958 | 0.444620423  |
| 8 | 5.497878608  | 11.027667772 | 7.295231097  |
| 8 | 3.903497559  | 5.442670031  | 6.404823675  |
| 8 | 3.902611685  | 5.248757460  | 13.320636041 |
| 8 | 13.322620656 | 5.319912081  | 6.400872683  |
| 8 | 13.306382745 | 5.335570077  | 13.280005920 |
| 8 | -0.818738782 | 13.521923148 | 6.373762051  |
| 8 | -0.783533678 | 13.464683643 | 13.266791969 |
| 8 | 8.596222040  | 13.569797640 | 6.373292616  |
| 8 | 8.596727476  | 13.465975934 | 13.290744010 |
| 8 | 1.882653667  | 7.438746864  | 0.448912218  |
| 8 | 1.802101666  | 7.421597983  | 7.338234011  |
| 8 | 11.366273099 | 7.460867759  | 0.486967285  |
| 8 | 11.367888748 | 7.436369185  | 7.345444074  |
| 8 | -2.827609702 | 15.569042436 | 0.445321243  |
| 8 | -2.822097304 | 15.571886779 | 7.329967699  |
| 8 | 6.557683511  | 15.584398933 | 0.435025142  |
| 8 | 6.614728474  | 15.647991253 | 7.348000895  |
| 8 | 2.811732563  | 0.699504397  | 6.394865763  |
| 8 | 2.830859144  | 0.699554450  | 13.300536233 |
| 8 | 12.203585249 | 0.680401112  | 6.382563543  |
| 8 | 12.226149399 | 0.686147396  | 13.285532733 |
| 8 | -1.948315459 | 8.831513082  | 6.375859375  |
| 8 | -1.843745039 | 8.866366385  | 13.283820637 |
| 8 | 7.166770374  | 8.591191173  | 6.046474101  |
| 8 | 7.496255815  | 8.862644030  | 13.296225173 |
| 8 | -2.702912038 | 6.079874100  | 0.454089308  |
| 8 | -2.688275449 | 6.060319744  | 7.334168925  |
| 8 | 6.674358353  | 6.042174627  | 0.473567559  |
| 8 | 6.819849121  | 5.885151639  | 7.362121192  |
| 8 | -7.420222083 | 14.207727078 | 0.452289771  |
| 8 | -7.389629964 | 14.200022974 | 7.344165631  |
| 8 | 2.035312194  | 14.179826623 | 0.426434022  |

|   |              |              |              |
|---|--------------|--------------|--------------|
| 8 | 1.996788370  | 14.207427423 | 7.327883515  |
| 8 | 7.377043358  | 2.080665529  | 6.387569031  |
| 8 | 7.487730417  | 1.997962532  | 13.272752813 |
| 8 | 16.797309657 | 2.085938254  | 6.396025227  |
| 8 | 16.838493043 | 2.066917914  | 13.282304881 |
| 8 | 2.654990514  | 10.242830675 | 6.373850999  |
| 8 | 2.727149028  | 10.242780690 | 13.312854070 |
| 8 | 12.109688660 | 10.223188689 | 6.375155488  |
| 8 | 12.055618576 | 10.261147044 | 13.303573820 |
| 8 | 3.926037345  | 5.444303909  | 3.930715791  |
| 8 | 3.919386196  | 5.341355981  | 10.822251984 |
| 8 | 13.301998424 | 5.364053389  | 3.904945921  |
| 8 | 13.315754188 | 5.317308200  | 10.788930538 |
| 8 | -0.820040110 | 13.492568908 | 3.880241151  |
| 8 | -0.806833072 | 13.456638963 | 10.771528187 |
| 8 | 8.586368518  | 13.504363640 | 3.886066712  |
| 8 | 8.578931033  | 13.574458205 | 10.801770643 |
| 8 | 0.792055716  | 2.781152115  | 2.957535543  |
| 8 | 0.799170007  | 2.763542696  | 9.839590690  |
| 8 | 10.205657708 | 2.805510790  | 2.961593070  |
| 8 | 10.235600474 | 2.640462089  | 9.812244047  |
| 8 | -3.921998924 | 10.933813350 | 2.943183481  |
| 8 | -3.909587801 | 10.885568758 | 9.816759047  |
| 8 | 5.521041273  | 10.916033291 | 2.929533514  |
| 8 | 5.535985360  | 11.038720650 | 9.783108668  |
| 8 | 2.836045338  | 0.721702155  | 3.899981399  |
| 8 | 2.800728371  | 0.667351165  | 10.805692533 |
| 8 | 12.205607800 | 0.688017443  | 3.892664106  |
| 8 | 12.227936157 | 0.692224047  | 10.788373334 |
| 8 | -1.923951997 | 8.849678125  | 3.883666068  |
| 8 | -1.895958011 | 8.848002518  | 10.787768916 |
| 8 | 7.800455980  | 8.904470506  | 3.674935736  |
| 8 | 7.533622371  | 8.891006355  | 10.827980045 |
| 8 | 1.903791948  | 7.474809971  | 2.939696879  |
| 8 | 1.799897962  | 7.373863555  | 9.857815574  |
| 8 | 11.233257315 | 7.421018638  | 2.978736184  |
| 8 | 11.372018519 | 7.469251853  | 9.834298274  |
| 8 | -2.812633533 | 15.602050844 | 2.937966854  |
| 8 | -2.830131455 | 15.550529409 | 9.826323547  |
| 8 | 6.617771033  | 15.622848472 | 2.929581616  |
| 8 | 6.538401300  | 15.591269346 | 9.845361016  |
| 8 | 7.360389442  | 2.102411931  | 3.895313393  |
| 8 | 7.410389117  | 2.029049290  | 10.787388993 |
| 8 | 16.813759103 | 2.085900416  | 3.904869940  |
| 8 | 16.841615452 | 2.060429769  | 10.795796351 |
| 8 | 2.612199125  | 10.257691888 | 3.876475267  |
| 8 | 2.979784821  | 10.125155463 | 10.863678443 |
| 8 | 12.030988403 | 10.226943428 | 3.883399785  |
| 8 | 12.159024294 | 10.174074456 | 10.816399446 |
| 8 | -2.699179957 | 6.074967611  | 2.948785593  |

|   |              |              |              |
|---|--------------|--------------|--------------|
| 8 | -2.704596881 | 6.067433915  | 9.832870050  |
| 8 | 6.710841279  | 6.058394801  | 2.957458486  |
| 8 | 6.810549321  | 5.846090504  | 9.942680451  |
| 8 | -7.411660246 | 14.227051171 | 2.945292235  |
| 8 | -7.363206752 | 14.218700460 | 9.839743617  |
| 8 | 1.973113705  | 14.215341420 | 2.922888766  |
| 8 | 1.986091834  | 14.226831002 | 9.823123722  |
| 9 | -0.000397206 | 0.007842261  | 1.684386686  |
| 9 | 0.000039504  | -0.010639882 | 8.616511643  |
| 9 | 9.406278473  | -0.018820916 | 1.707798424  |
| 9 | 9.395085602  | -0.067017808 | 8.559216753  |
| 9 | -4.707076011 | 8.163982918  | 1.721313493  |
| 9 | -4.702387589 | 8.128600150  | 8.577650723  |
| 9 | 4.725316251  | 8.155008364  | 1.700998379  |
| 9 | 4.401258871  | 8.134197109  | 8.600811748  |
| 9 | 0.018585673  | 0.024170552  | 5.123591178  |
| 9 | 0.007063172  | -0.020022824 | 12.068039277 |
| 9 | 9.394299724  | 0.005563081  | 5.125898641  |
| 9 | 9.428581226  | -0.078659168 | 12.024020187 |
| 9 | 14.073107779 | 8.136001280  | 5.125907953  |
| 9 | -4.687027966 | 8.124399086  | 12.073415174 |
| 9 | 4.565010559  | 8.270519066  | 4.997493932  |
| 9 | 4.679206676  | 7.978255643  | 12.148598789 |
